# Supplementary material for: Helicene synthesis by Brønsted acid-catalyzed cycloaromatization in HFIP [(CF3)2CHOH]
Source: publisher site journal article supplement (doi:10.3762/bjoc.17.35), 2021-02-09

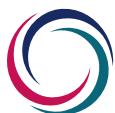

## Supporting Information

for

### Helicene synthesis by Brønsted acid-catalyzed cycloaromatization in HFIP [(CF<sub>3</sub>)<sub>2</sub>CHOH]

Takeshi Fujita, Noriaki Shoji, Nao Yoshikawa and Junji Ichikawa

*Beilstein J. Org. Chem.* **2021**, *17*, 396–403. doi:10.3762/bjoc.17.35

### Detailed experimental procedures and spectral data

|                                                                                   |            |
|-----------------------------------------------------------------------------------|------------|
| <b>1. General statement .....</b>                                                 | <b>S2</b>  |
| <b>2. Preparation of cyclization precursors .....</b>                             | <b>S3</b>  |
| <b>3. Synthesis of helicenes .....</b>                                            | <b>S14</b> |
| <b>4. References .....</b>                                                        | <b>S19</b> |
| <b>5. <math>^1\text{H}</math> and <math>^{13}\text{C}</math> NMR charts .....</b> | <b>S21</b> |

## 1. General statement

$^1\text{H}$  NMR and  $^{13}\text{C}$  NMR spectra were recorded on a Bruker Avance 500 or a JEOL ECS-400 spectrometer. Chemical shift values are given in ppm relative to internal  $\text{Me}_4\text{Si}$  (for  $^1\text{H}$  NMR:  $\delta = 0.00$  ppm) and  $\text{CDCl}_3$  (for  $^{13}\text{C}$  NMR:  $\delta = 77.0$  ppm). IR spectra were recorded on a Horiba FT-300S spectrometer by the attenuated total reflectance (ATR) method. Mass spectra were measured on a JEOL JMS-T100GCV or a JEOL JMS-T100CS spectrometer. Elemental analyses were carried out at the Elemental Analysis Laboratory, Division of Chemistry, Faculty of Pure and Applied Sciences, University of Tsukuba.

Column chromatography and preparative thin-layer chromatography (PTLC) were conducted on silica gel (Silica Gel 60 N, Kanto Chemical Co., Inc. for column chromatography and Wakogel B-5F, Wako Pure Chemical Industries for PTLC). *N,N*-dimethylformamide (DMF) was purified by a solvent-purification system (GlassContour) equipped with columns of activated alumina and supported-copper catalyst (Q-5) before use. 1,1,1,3,3,3-Hexafluoropropan-2-ol (HFIP) was distilled from molecular sieves 4 Å and stored over activated molecular sieves 4 Å. 1,4-Dioxane was distilled from sodium and stored over activated molecular sieves 4 Å. 1,8-Diiodonaphthalene (**2b**) [1], 2-{2-[(1,3-dioxolan-2-yl)methyl]phenyl}-4,4,5,5-tetramethyl-1,3,2-dioxaborolane (**3**) [2], 2,5-dibromoterephthalaldehyde [3], 4,6-dibromoisophthalaldehyde [4], 3-bromobenzofuran (**10a**) [5], 3-bromobenzo[*b*]thiophene (**10b**) [6], 3-bromo-1-(4-methylbenzenesulfonyl)-1*H*-indole (**10c**) [7], 3,4-dibromofuran (**13a**) [8], 3,4-dibromothiophene (**13b**) [9], 3,4-dibromo-1-(4-methylbenzenesulfonyl)-1*H*-pyrrole (**13c**) [10], and 3-bromobenzo[*b*]thiophene-2-carbaldehyde [5] were prepared according to the literature procedures, and their spectral data showed good agreement with the literature data. Unless otherwise noted,

materials were obtained from commercial sources and used directly without further purifications.

## 2. Preparation of cyclization precursors

### 2,2'--[2,5-Di(naphthalen-1-yl)-1,4-phenylene]bis(methylene)}bis(1,3-dioxolane) (8a)

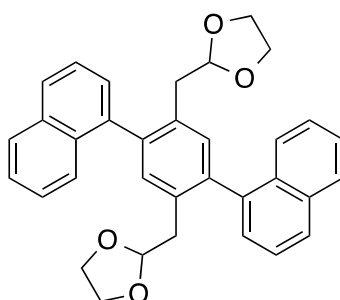

A dioxane (0.66 mL) and H<sub>2</sub>O (0.34 mL) solution of dibromobisacetal **6a** (92 mg, 0.22 mmol), (naphthalen-1-yl)boronic acid (**7**, 137 mg, 0.80 mmol), Pd<sub>2</sub>(dba)<sub>3</sub>·CHCl<sub>3</sub> (6.7 mg, 6.5 μmol), SPhos (11 mg, 27 μmol), and Na<sub>2</sub>CO<sub>3</sub> (129 mg, 1.2 mmol) was degassed by using the freeze-pump-thaw method three times. After stirring at 120 °C for 5 h, ethyl acetate and water were added to the mixture, and organic materials were extracted with ethyl acetate three times. The combined extracts were washed with brine and dried over Na<sub>2</sub>SO<sub>4</sub>. After removal of the solvent under reduced pressure, the residue was purified by silica gel column chromatography (toluene/EtOAc = 30:1) to give **8a** (78 mg, 70%) as a white solid.

<sup>1</sup>H NMR (500 MHz, CDCl<sub>3</sub>): δ 2.64–2.82 (m, 4H), 3.60–3.75 (m, 8H), 4.86–4.90 (m, 2H), 7.39–7.60 (m, 10H), 7.63–7.69 (m, 2H), 7.86–7.96 (m, 4H). <sup>13</sup>C NMR (126 MHz, CDCl<sub>3</sub>): δ 37.49, 37.53, 64.53, 64.55, 104.2, 104.3, 125.3, 125.69, 125.74, 125.9, 126.0, 126.3, 126.4, 127.4, 127.59, 127.61, 128.1, 128.2, 132.38, 132.42, 132.47, 132.51, 133.0, 133.1, 133.6, 139.00, 139.03, 139.7, 139.8. IR (neat): ν 3057, 2964,

2883, 1508, 1396, 1128, 1045, 804, 777, 669  $\text{cm}^{-1}$ . HRMS (APCI+):  $m/z$  Calcd. for  $\text{C}_{34}\text{H}_{31}\text{O}_4$   $[\text{M} + \text{H}]^+$ : 503.2217; Found: 503.2204.

**2,2'-{[4,6-Di(naphthalen-1-yl)-1,3-phenylene]bis(methylene)}bis(1,3-dioxolane)**  
**(8b)**

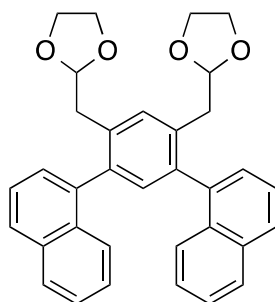

Compound **8b** was also prepared by the method described for compound **8a** using dibromobisacetal **6b** (490 mg, 1.20 mmol), (naphthalen-1-yl)boronic acid (**7**, 1.03 g, 6.00 mmol),  $\text{Pd}_2(\text{dba})_3 \cdot \text{CHCl}_3$  (30 mg, 29  $\mu\text{mol}$ ),  $\text{PPh}_3$  (30 mg, 0.11 mmol),  $\text{Na}_2\text{CO}_3$  (704 mg, 6.64 mmol), dioxane (4.0 mL), and  $\text{H}_2\text{O}$  (2.0 mL) at 120  $^\circ\text{C}$  for 8 h. Purification by silica gel column chromatography (hexane/EtOAc = 3:1) gave **8b** (517 mg, 86%) as a white solid.

$^1\text{H}$  NMR (500 MHz,  $\text{CDCl}_3$ ):  $\delta$  2.74–2.78 (m, 2H), 2.86–2.89 (m, 2H), 3.71–3.84 (m, 8H), 4.96–4.98 (m, 2H), 7.16–7.17 (m, 1H), 7.38–7.50 (m, 8H), 7.61–7.66 (m, 3H), 7.82 (d,  $J$  = 8.1 Hz, 2H), 7.85 (d,  $J$  = 8.2 Hz, 2H).  $^{13}\text{C}$  NMR (126 MHz,  $\text{CDCl}_3$ ):  $\delta$  37.8, 37.9, 64.6, 64.7, 104.36, 104.39, 125.1, 125.62, 125.64, 125.89, 125.93, 126.2, 126.3, 127.3, 127.4, 127.6, 128.1, 131.9, 132.1, 132.3, 132.4, 132.9, 133.1, 133.5, 134.2, 134.3, 138.62, 138.63, 138.7, 138.8. IR (neat):  $\nu$  3057, 2968, 2883, 1508, 1394, 1130, 1039, 945, 779, 669  $\text{cm}^{-1}$ . HRMS (APCI+):  $m/z$  Calcd. for  $\text{C}_{34}\text{H}_{31}\text{O}_4$   $[\text{M} + \text{H}]^+$ : 503.2217; Found: 503.2234.

### 3-{2-[(1,3-Dioxolan-2-yl)methyl]phenyl}benzofuran (11a)

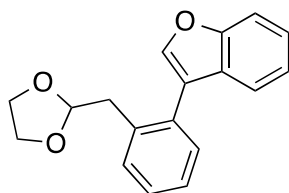

A dioxane (3.3 mL) and H<sub>2</sub>O (1.7 mL) solution of 3-bromobenzofuran (**10a**, 197 mg, 1.0 mmol), boronate ester **3** (319 mg, 1.10 mmol), Pd<sub>2</sub>(dba)<sub>3</sub>·CHCl<sub>3</sub> (13 mg, 13 μmol), PPh<sub>3</sub> (13 mg, 50 μmol), and K<sub>3</sub>PO<sub>4</sub> (1.27 g, 5.98 mmol) was degassed by using the freeze-pump-thaw method three times. After stirring at 120 °C for 13 h, ethyl acetate and water were added to the mixture, and organic materials were extracted with ethyl acetate three times. The combined extracts were washed with brine and dried over Na<sub>2</sub>SO<sub>4</sub>. After removal of the solvent under reduced pressure, the residue was purified by silica gel column chromatography (hexane/EtOAc = 10/1 and hexane/EtOAc = 20:1) to give **11a** (258 mg, 92%) as a yellow solid.

<sup>1</sup>H NMR (500 MHz, CDCl<sub>3</sub>): δ 3.03 (d, *J* = 4.9 Hz, 2H), 3.69–3.94 (m, 4H), 5.00 (t, *J* = 4.9 Hz, 1H), 7.20–7.25 (m, 1H), 7.29–7.38 (m, 3H), 7.40 (d, *J* = 7.3 Hz, 1H), 7.43 (d, *J* = 7.8 Hz, 1H), 7.50 (d, *J* = 7.1 Hz, 1H), 7.53 (d, *J* = 8.3 Hz, 1H), 7.74 (s, 1H). <sup>13</sup>C NMR (126 MHz, CDCl<sub>3</sub>): δ 37.7, 64.8, 104.5, 111.5, 120.3, 120.7, 122.8, 124.4, 126.7, 127.8, 128.1, 130.76, 130.82, 131.4, 135.1, 142.6, 155.0. IR (neat): ν 3064, 2956, 2883, 1606, 1489, 1473, 1452, 1398, 1333, 1219, 1132, 1109, 1086, 1036, 991, 964, 943, 858, 746 cm<sup>-1</sup>. HRMS (EI) *m/z* Calcd. for C<sub>18</sub>H<sub>16</sub>O<sub>3</sub> [M]<sup>+</sup>: 280.1094; Found: 280.1108.

### 2-[2-(Benzo[*b*]thiophen-3-yl)benzyl]-1,3-dioxolane (11b)

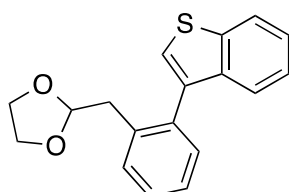

Compound **11b** was prepared by the method described for compound **11a** using 3-bromobenzo[*b*]thiophene (**10b**, 82 mg, 0.39 mmol), boronate ester **3** (125 mg, 0.43 mmol), Pd<sub>2</sub>(dba)<sub>3</sub>·CHCl<sub>3</sub> (11 mg, 11 μmol), PPh<sub>3</sub> (12 mg, 46 μmol), K<sub>3</sub>PO<sub>4</sub> (486 mg, 2.29 mmol), dioxane (1.3 mL), and H<sub>2</sub>O (0.6 mL) at 120 °C for 13 h. Purification by silica gel column chromatography (hexane/EtOAc = 10:1 and hexane/CH<sub>2</sub>Cl<sub>2</sub> = 1:2) gave **11b** (91 mg, 80%) as a yellow solid.

<sup>1</sup>H NMR (500 MHz, CDCl<sub>3</sub>): δ 2.87 (d, *J* = 5.0 Hz, 2H), 3.62–3.85 (m, 4H), 4.92 (t, *J* = 5.0 Hz, 1H), 7.26–7.43 (m, 7H), 7.50 (d, *J* = 7.6 Hz, 1H), 7.87 (d, *J* = 7.8 Hz, 1H). <sup>13</sup>C NMR (126 MHz, CDCl<sub>3</sub>): δ 37.7, 64.6, 104.3, 122.6, 123.0, 124.1, 124.2, 124.3, 126.5, 127.8, 130.6, 130.7, 135.3, 135.8, 136.7, 139.3, 139.8. IR (neat): ν 3060, 3022, 2962, 2881, 1483, 1425, 1396, 1340, 1257, 1214, 1190, 1128, 1103, 1036, 987, 943, 840, 813, 762, 734, 638, 534, 509 cm<sup>-1</sup>. HRMS (EI) *m/z* Calcd. for C<sub>18</sub>H<sub>16</sub>O<sub>2</sub>S [M]<sup>+</sup>: 296.0866; Found: 296.0878.

### 3-{2-[(1,3-Dioxolan-2-yl)methyl]phenyl}-1-(4-methylbenzenesulfonyl)-1*H*-indole (**11c**)

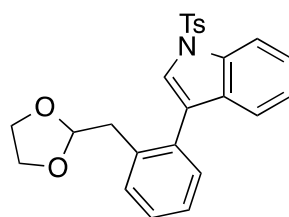

Compound **11c** was prepared by the method described for compound **11a** using 3-bromo-1-(4-methylbenzenesulfonyl)-1*H*-indole (**10c**, 526 mg, 1.50 mmol), boronate ester **3** (958 mg, 3.30 mmol), Pd<sub>2</sub>(dba)<sub>3</sub>·CHCl<sub>3</sub> (20 mg, 19 μmol), PPh<sub>3</sub> (20 mg, 76 μmol), K<sub>3</sub>PO<sub>4</sub> (1.92 g, 9.04 mmol), dioxane (5.0 mL), and H<sub>2</sub>O (2.5 mL) at 120 °C for 10 h. Purification by silica gel column chromatography (hexane/EtOAc = 5:1 and hexane/CH<sub>2</sub>Cl<sub>2</sub> = 1:2) gave **11c** (608 mg, 93%) as a yellow oil.

$^1\text{H}$  NMR (500 MHz,  $\text{CDCl}_3$ ):  $\delta$  2.28 (s, 3H), 2.91 (d,  $J$  = 5.0 Hz, 2H), 3.70–3.92 (m, 4H), 4.98 (t,  $J$  = 5.0 Hz, 1H), 7.15–7.21 (m, 3H), 7.25–7.35 (m, 5H), 7.47 (d,  $J$  = 7.8 Hz, 1H), 7.74 (s, 1H), 7.79 (d,  $J$  = 8.4 Hz, 2H), 8.05 (dd,  $J$  = 8.1, 1.1 Hz, 1H).  $^{13}\text{C}$  NMR (126 MHz,  $\text{CDCl}_3$ ):  $\delta$  21.4, 37.6, 64.7, 104.5, 113.6, 120.3, 122.6, 123.4, 124.7, 124.9, 126.5, 126.7, 127.8, 129.8, 130.71, 130.73, 131.0, 132.4, 134.8, 134.98, 135.05, 144.8. IR (neat):  $\nu$  3156, 3064, 3020, 2960, 1597, 1491, 1444, 1398, 1369, 1306, 1188, 1174, 1126, 1111, 1088, 1036, 1020, 1011, 931, 811, 742, 717, 665, 636, 600, 569, 536  $\text{cm}^{-1}$ . HRMS (ESI+)  $m/z$  Calcd. for  $\text{C}_{25}\text{H}_{23}\text{NNaO}_4\text{S}$  [ $\text{M} + \text{Na}$ ] $^+$ : 456.1240; Found: 456.1261.

### 3,4-Bis{2-[(1,3-dioxolan-2-yl)methyl]phenyl}furan (**14a**)

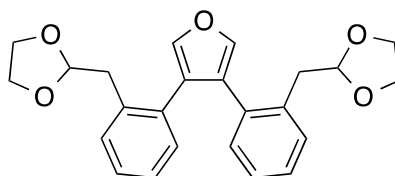

A dioxane (1.7 mL) and  $\text{H}_2\text{O}$  (0.8 mL) solution of 3,4-dibromofuran (**13a**, 113 mg, 0.50 mmol), boronate ester **3** (319 mg, 1.10 mmol),  $\text{Pd}_2(\text{dba})_3 \cdot \text{CHCl}_3$  (13 mg, 13  $\mu\text{mol}$ ), SPhos (10 mg, 25  $\mu\text{mol}$ ), and  $\text{K}_3\text{PO}_4$  (642 mg, 3.02 mmol) was degassed by using the freeze-pump-thaw method three times. After stirring at 120  $^\circ\text{C}$  for 15 h, ethyl acetate and water were added to the mixture, and organic materials were extracted with ethyl acetate three times. The combined extracts were washed with brine and dried over  $\text{Na}_2\text{SO}_4$ . After removal of the solvent under reduced pressure, the residue was purified by silica gel column chromatography (hexane/EtOAc = 5:1) to give **14a** (104 mg, 53%) as a yellow oil.

$^1\text{H}$  NMR (500 MHz,  $\text{CDCl}_3$ ):  $\delta$  2.86 (d,  $J$  = 4.9 Hz, 4H), 3.72–3.94 (m, 8H), 4.78 (t,  $J$  = 4.9 Hz, 2H), 7.03–7.10 (m, 4H), 7.18 (ddd,  $J$  = 7.6, 7.5, 1.6 Hz, 2H), 7.31 (d,  $J$  = 7.6



Hz, 2H), 7.58 (s, 2H).  $^{13}\text{C}$  NMR (126 MHz,  $\text{CDCl}_3$ ):  $\delta$  37.4, 64.6, 104.4, 125.4, 126.2, 127.3, 130.4, 131.1, 131.8, 134.8, 141.2. IR (neat):  $\nu$  3060, 2956, 2883, 1761, 1734, 1558, 1543, 1506, 1489, 1473, 1456, 1446, 1398, 1362, 1338, 1223, 1134, 1036, 991, 954, 945, 877, 822, 764, 706, 611, 598, 573  $\text{cm}^{-1}$ . HRMS (ESI+)  $m/z$  Calcd. for  $\text{C}_{24}\text{H}_{24}\text{NaO}_5$   $[\text{M} + \text{Na}]^+$ : 415.1516; Found: 415.1502.

### 3,4-Bis{2-[(1,3-dioxolan-2-yl)methyl]phenyl}thiophene (**14b**)

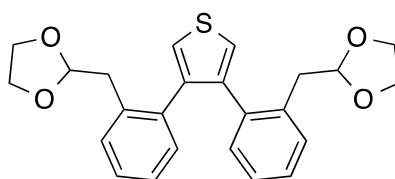

Compound **14b** was prepared by the method described for compound **14a** using 3,4-dibromothiophene (**13b**, 411 mg, 1.70 mmol), boronate ester **3** (1.08 g, 3.74 mmol),  $\text{Pd}_2(\text{dba})_3 \cdot \text{CHCl}_3$  (22 mg, 21  $\mu\text{mol}$ ), SPhos (38 mg, 93  $\mu\text{mol}$ ),  $\text{K}_3\text{PO}_4$  (2.17 g, 10.2 mmol), dioxane (5.6 mL), and  $\text{H}_2\text{O}$  (2.8 mL) at 100  $^\circ\text{C}$  for 2 h. Purification by silica gel column chromatography (hexane) gave **14b** (530 mg, 76%) as a brown solid.

$^1\text{H}$  NMR (500 MHz,  $\text{CDCl}_3$ ):  $\delta$  2.81 (d,  $J$  = 5.0 Hz, 4H), 3.76–3.91 (m, 8H), 4.81 (t,  $J$  = 5.0 Hz, 2H), 7.02–7.06 (m, 4H), 7.15 (dd,  $J$  = 7.7, 7.7 Hz, 2H), 7.29 (d,  $J$  = 7.7 Hz, 2H), 7.34 (s, 2H).  $^{13}\text{C}$  NMR (126 MHz,  $\text{CDCl}_3$ ):  $\delta$  37.3, 64.7, 104.5, 124.4, 125.9, 127.2, 130.0, 131.0, 134.6, 136.5, 141.4. IR (neat):  $\nu$  3060, 2883, 1481, 1396, 1132, 1035, 822, 760, 580  $\text{cm}^{-1}$ . Elem. Anal. Calcd. for  $\text{C}_{24}\text{H}_{24}\text{O}_4\text{S}$ : C 70.56%, H 5.92%; Found: C 70.20%, H 5.76%.

**3,4-Bis{2-[(1,3-dioxolan-2-yl)methyl]phenyl}-1-(4-methylbenzenesulfonyl)-1*H*-pyrrole (14c)**

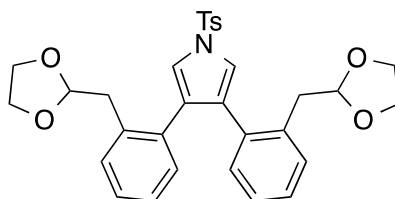

Compound **14c** was prepared by the method described for compound **14a** using 3,4-dibromo-1-(4-methylbenzenesulfonyl)-1*H*-pyrrole (**13c**, 113 mg, 0.30 mmol), boronate ester **3** (192 mg, 0.66 mmol), Pd<sub>2</sub>(dba)<sub>3</sub>·CHCl<sub>3</sub> (7.9 mg, 7.6 μmol), SPhos (12 mg, 29 μmol), K<sub>3</sub>PO<sub>4</sub> (384 mg, 1.81 mmol), dioxane (1.0 mL), and H<sub>2</sub>O (0.5 mL) at 120 °C for 5 h. Purification by silica gel column chromatography (hexane/EtOAc = 3:1 and 2:1) gave **14c** (128 mg, 78%) as a yellow solid.

<sup>1</sup>H NMR (500 MHz, CDCl<sub>3</sub>): δ 2.42 (s, 3H), 2.75 (d, *J* = 5.0 Hz, 4H), 3.68–3.91 (m, 8H), 4.72 (t, *J* = 5.0 Hz, 2H), 6.93 (d, *J* = 7.6 Hz, 2H), 7.01 (dd, *J* = 7.3, 7.3 Hz, 2H), 7.14 (ddd, *J* = 7.6, 7.3, 1.0 Hz, 2H), 7.26 (d, *J* = 7.3 Hz, 2H), 7.31 (d, *J* = 8.3 Hz, 2H), 7.33 (s, 2H), 7.81 (d, *J* = 8.3 Hz, 2H). <sup>13</sup>C NMR (126 MHz, CDCl<sub>3</sub>): δ 21.6, 37.3, 64.6, 104.4, 120.1, 126.1, 126.8, 127.2, 128.6, 129.9, 130.2, 131.1, 133.3, 134.6, 136.0, 144.9. IR (neat): ν 3136, 3060, 3020, 2960, 2885, 1597, 1529, 1475, 1442, 1400, 1371, 1324, 1188, 1173, 1132, 1092, 1076, 1053, 989, 951, 948, 874, 814, 754, 704, 671, 594, 540, 521 cm<sup>-1</sup>. HRMS (ESI+) *m/z* Calcd. for C<sub>31</sub>H<sub>31</sub>NNaO<sub>6</sub>S [M + Na]<sup>+</sup>: 568.1764; Found: 568.1737.

**2-[(3-Bromobenzo[*b*]thiophen-2-yl)methyl]-1,3-dioxolane (16)**

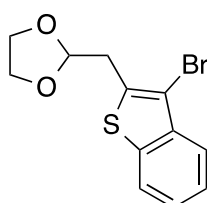

To a THF (6.0 mL) solution of  $\text{Ph}_3\text{P}^+\text{CH}_2\text{OCH}_3\text{Cl}^-$  (1.55 g, 4.52 mmol) was added  $\text{NaOt-Bu}$  (566 mg, 5.89 mmol) at 0 °C. After stirring at the same temperature for 30 min, a THF (2.0 mL) and dichloromethane (3.0 mL) solution of 3-bromobenzo[*b*]thiophene-2-carbaldehyde (718 mg, 2.98 mmol) was added. After stirring at the same temperature for another 2 h, the reaction was quenched with  $\text{H}_2\text{O}$ , and organic materials were extracted with ethyl acetate three times. The combined extracts were washed with brine and dried over  $\text{Na}_2\text{SO}_4$ . After removal of the solvent under reduced pressure, ethylene glycol (367 mg, 5.92 mmol) and  $\text{TsOH}\cdot\text{H}_2\text{O}$  (565 mg, 2.97 mmol) were added to a toluene (50 mL) solution of the obtained crude mixture. After stirring at 150 °C for 3 h in a reaction vessel equipped with a Dean–Stark apparatus, aqueous  $\text{NaHCO}_3$  was added to the reaction mixture. The organic layer was separated and the aqueous layer was extracted with ethyl acetate three times. The combined extracts were washed with brine and dried over  $\text{Na}_2\text{SO}_4$ . After removal of the solvent under reduced pressure, the residue was purified by silica gel column chromatography (hexane/EtOAc = 10:1) to give **16** (709 mg, 80%) as a yellow oil.

$^1\text{H}$  NMR (500 MHz,  $\text{CDCl}_3$ ):  $\delta$  3.36 (d,  $J$  = 4.4 Hz, 2H), 3.83–4.07 (m, 4H), 5.23 (t,  $J$  = 4.4 Hz, 1H), 7.34 (ddd,  $J$  = 7.8, 7.6, 1.2 Hz, 1H), 7.41 (ddd,  $J$  = 7.8, 7.5, 1.0 Hz, 1H), 7.75 (d,  $J$  = 7.6 Hz, 1H), 7.76 (d,  $J$  = 7.5 Hz, 1H).  $^{13}\text{C}$  NMR (126 MHz,  $\text{CDCl}_3$ ):  $\delta$  34.9, 65.2, 102.6, 108.0, 122.1, 122.9, 124.8, 125.0, 133.4, 137.8, 138.0. IR (neat):  $\nu$  3060, 2960, 2883, 1433, 1394, 1304, 1252, 1209, 1124, 1018, 1007, 984, 943, 920, 847, 748, 725, 714, 673, 604, 517  $\text{cm}^{-1}$ . HRMS (EI)  $m/z$  Calcd. for  $\text{C}_{12}\text{H}_{11}^{79}\text{BrO}_2\text{S}$   $[\text{M}]^+$ : 297.9658; Found: 297.9656.

## 2-[(2'-Bromo-[1,1'-biphenyl]-2-yl)methyl]-1,3-dioxolane

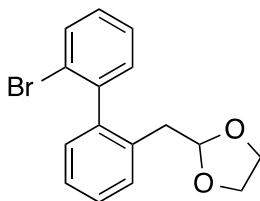

A dioxane (31.7 mL) and H<sub>2</sub>O (15.8 mL) solution of 1-bromo-2-iodobenzene (2.69 g, 9.50 mmol), boronate ester **3** (2.90 g, 9.99 mmol), Pd<sub>2</sub>(dba)<sub>3</sub>·CHCl<sub>3</sub> (160 mg, 0.15 mmol), PPh<sub>3</sub> (162 mg, 0.62 mmol), and K<sub>3</sub>PO<sub>4</sub> (8.04 g, 37.9 mmol) was degassed by using the freeze-pump-thaw method three times. After stirring at 120 °C for 2 h, ethyl acetate was added to the mixture, and organic materials were extracted with ethyl acetate three times. The combined extracts were washed with brine and dried over Na<sub>2</sub>SO<sub>4</sub>. After removal of the solvent under reduced pressure, the residue was purified by silica gel column chromatography (hexane/EtOAc = 10:1) to give 2-[(2'-bromo-[1,1'-biphenyl]-2-yl)methyl]-1,3-dioxolane (2.68 g, 88%) as a yellow oil.

<sup>1</sup>H NMR (500 MHz, CDCl<sub>3</sub>): δ 2.74 (dd, *J* = 14.3, 5.2 Hz, 1H), 2.85 (dd, *J* = 14.3, 5.0 Hz, 1H), 3.70–3.92 (m, 4H), 4.93 (dd, *J* = 5.2, 5.0 Hz, 1H), 7.13 (d, *J* = 7.5 Hz, 1H), 7.17–7.40 (m, 5H), 7.46 (d, *J* = 7.6 Hz, 1H), 7.64 (d, *J* = 8.0 Hz, 1H). <sup>13</sup>C NMR (126 MHz, CDCl<sub>3</sub>): δ 37.7, 64.66, 64.73, 104.0, 123.8, 126.4, 127.0, 127.9, 128.8, 129.7, 130.2, 131.4, 132.5, 134.1, 141.4, 142.0. IR (neat): ν 3060, 2962, 2885, 1466, 1444, 1423, 1398, 1134, 1047, 1027, 1005, 985, 943, 754, 732, 660, 523 cm<sup>-1</sup>. HRMS (EI) *m/z* Calcd. for C<sub>16</sub>H<sub>15</sub><sup>79</sup>BrO<sub>2</sub> [M]<sup>+</sup>: 318.0250; Found: 318.0247.

**2-{2'-[(1,3-Dioxolan-2-yl)methyl]-[1,1'-biphenyl]-2-yl}-4,4,5,5-tetramethyl-1,3,2-dioxaborolane (17)**

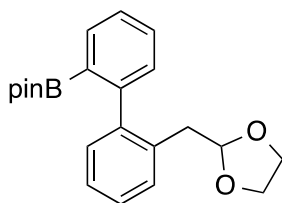

A 1,4-dioxane (42.0 mL) solution of 2-[(2'-bromo-[1,1'-biphenyl]-2-yl)methyl]-1,3-dioxolane (4.33 g, 13.6 mmol), B<sub>2</sub>pin<sub>2</sub> (3.90 g, 15.4 mmol), PdCl<sub>2</sub>(dppf)·CH<sub>2</sub>Cl<sub>2</sub> (115 mg, 0.140 mmol) and KOAc (5.50 g, 56.0 mmol) was degassed by using the freeze-pump-thaw method three times. After stirring at 120 °C for 14 h, ethyl acetate and water were added to the mixture, and organic materials were extracted with ethyl acetate three times. The combined extracts were washed with brine and dried over Na<sub>2</sub>SO<sub>4</sub>. After removal of the solvent under reduced pressure, the residue was purified by silica gel column chromatography (toluene/EtOAc = 50:1) to give **17** (2.55 g, 51%) as a yellow oil.

<sup>1</sup>H NMR (500 MHz, CDCl<sub>3</sub>): δ 1.04 (s, 6H), 1.07 (s, 6H), 2.82 (d, *J* = 5.2 Hz, 2H), 3.68–3.89 (m, 4H), 4.90 (t, *J* = 5.2 Hz, 1H), 7.11 (d, *J* = 7.5 Hz, 1H), 7.18 (dd, *J* = 7.4, 7.4 Hz, 1H), 7.22 (d, *J* = 7.6 Hz, 1H), 7.27 (dd, *J* = 7.6, 7.4 Hz, 1H), 7.31 (dd, *J* = 7.5, 7.4 Hz, 1H), 7.36 (d, *J* = 7.6 Hz, 1H), 7.39–7.42 (m, 1H), 7.72 (d, *J* = 7.4 Hz, 1H). <sup>13</sup>C NMR (126 MHz, CDCl<sub>3</sub>): δ 24.3, 24.4, 37.8, 64.5, 64.57, 64.62, 83.2, 104.3, 125.4, 126.1, 126.8, 129.3, 129.5, 129.7, 129.9, 134.0, 134.1, 143.6, 147.0. IR (neat): ν 3060, 2981, 2931, 2883, 1595, 1479, 1437, 1381, 1352, 1315, 1269, 1144, 1119, 1078, 1039, 860, 754, 667 cm<sup>-1</sup>. HRMS (EI) *m/z* Calcd. for C<sub>22</sub>H<sub>27</sub>BO<sub>4</sub> [M]<sup>+</sup>: 366.1997; Found: 366.2015.

**2-[(3-{2'-[(1,3-Dioxolan-2-yl)methyl]-[1,1'-biphenyl]-2-yl}benzo[*b*]thiophen-2-yl)methyl]-1,3-dioxolane (18)**

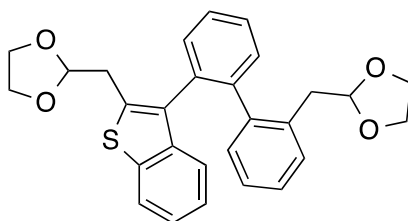

A dioxane (1.6 mL) and H<sub>2</sub>O (0.8 mL) solution of 2-[(3-bromobenzo[*b*]thiophen-2-yl)methyl]-1,3-dioxolane (**16**, 140 mg, 0.47 mmol), boronate ester **17** (190 mg, 0.52 mmol), Pd<sub>2</sub>(dba)<sub>3</sub>·CHCl<sub>3</sub> (12 mg, 12 μmol), SPhos (20 mg, 48 μmol), and K<sub>3</sub>PO<sub>4</sub> (601 mg, 2.83 mmol) was degassed by using the freeze-pump-thaw method three times. After stirring at 120 °C for 9 h, ethyl acetate and water were added to the mixture, and organic materials were extracted with ethyl acetate three times. The combined extracts were washed with brine and dried over Na<sub>2</sub>SO<sub>4</sub>. After removal of the solvent under reduced pressure, the residue was purified by silica gel column chromatography (hexane/EtOAc = 3:1) to give **18** (199 mg, 92%) as a yellow oil.

<sup>1</sup>H NMR (500 MHz, CDCl<sub>3</sub>): δ 2.43 (dd, *J* = 14.4, 5.0 Hz, 0.5H), 2.63 (dd, *J* = 15.0, 3.9 Hz, 0.5H), 2.83–2.91 (m, 2H), 3.00 (dd, *J* = 14.4, 5.1 Hz, 0.5H), 3.05 (dd, *J* = 15.0, 4.7 Hz, 0.5H), 3.68–3.99 (m, 8H), 4.61 (dd, *J* = 3.9, 3.9 Hz, 0.5H), 4.80 (dd, *J* = 5.0, 5.0 Hz, 0.5H), 4.82 (dd, *J* = 4.6, 4.5 Hz, 0.5H), 5.10 (dd, *J* = 4.9, 4.9 Hz, 0.5H), 6.74–6.81 (m, 1H), 7.00–7.08 (m, 1.5H), 7.09–7.12 (m, 0.5H), 7.13–7.18 (m, 1.5H), 7.20–7.27 (m, 1.5H), 7.33–7.37 (m, 1H), 7.39–7.49 (m, 3.5H), 7.52–7.55 (m, 0.5H), 7.62–7.65 (m, 0.5H), 7.67–7.71 (m, 0.5H). <sup>13</sup>C NMR (126 MHz, CDCl<sub>3</sub>): δ 34.0, 34.5, 37.1, 37.3, 64.5, 64.6, 64.66, 64.75, 64.8, 65.01, 65.05, 103.3, 103.4, 104.5, 104.8, 121.6, 121.7, 122.7, 123.0, 123.5, 123.6, 123.7, 125.56, 125.61, 126.91, 126.95, 127.2, 127.3, 127.4, 127.7, 129.4, 129.7, 130.3, 131.5, 131.6, 131.7, 132.0, 133.5, 133.9, 134.2, 134.3, 134.57, 134.58, 134.7, 135.0, 138.8, 139.5, 140.57, 140.63, 141.0, 141.4, 141.6. IR

(neat):  $\nu$  3055, 2952, 2884, 1473, 1456, 1435, 1396, 1039, 1007, 984, 943, 752, 735  $\text{cm}^{-1}$ . HRMS (APCI+)  $m/z$  Calcd. for  $\text{C}_{28}\text{H}_{27}\text{O}_4\text{S}$   $[\text{M} + \text{H}]^+$ : 459.1625; Found: 459.1648.

### 3. Synthesis of helicenes

#### Benzo[*a*]naphtho[1,2-*k*]tetraphene (5a)

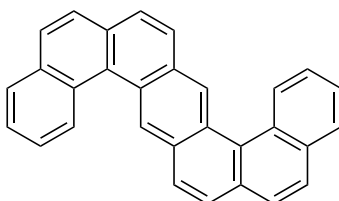

Compound **5a** was synthesized by the method described for compound **1a** using bisacetal **8a** (70 mg, 0.14 mmol), trifluoromethanesulfonic acid (3.2 mg, 21  $\mu\text{mol}$ ), and HFIP (0.5 mL) at 0  $^{\circ}\text{C}$  for 40 min. Purification by PTLC (hexane/ $\text{CH}_2\text{Cl}_2$  = 1:1) gave **5a** (48 mg, 90%) as a yellow solid.

$^1\text{H}$  NMR (500 MHz,  $\text{CDCl}_3$ ):  $\delta$  7.66 (dd,  $J$  = 7.4, 7.2 Hz, 2H), 7.76 (dd,  $J$  = 8.4, 7.2 Hz, 2H), 7.79 (d,  $J$  = 8.6 Hz, 2H), 7.85 (d,  $J$  = 8.4 Hz, 2H), 7.96 (d,  $J$  = 8.4 Hz, 2H), 8.02 (d,  $J$  = 8.6 Hz, 2H), 8.06 (d,  $J$  = 7.4 Hz, 2H), 9.31 (d,  $J$  = 8.4 Hz, 2H), 9.58 (s, 2H).  $^{13}\text{C}$  NMR (126 MHz,  $\text{CDCl}_3$ ):  $\delta$  125.8, 126.6, 126.8, 127.1, 127.2, 127.5, 127.7, 127.9, 128.2, 128.6, 128.7, 130.4, 131.0, 131.7, 133.5.

Spectral data for this compound showed good agreement with literature data [11].

#### Benzo[*a*]naphtho[2,1-*m*]tetraphene (5b)

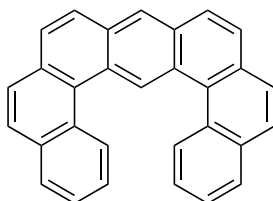

Compound **5b** was synthesized by the method described for compound **1a** using bisacetal **8b** (101 mg, 0.20 mmol), trifluoromethanesulfonic acid (4.7 mg, 31  $\mu$ mol), and HFIP (0.7 mL) at 0 °C for 40 min. Purification by silica gel column chromatography (hexane/CH<sub>2</sub>Cl<sub>2</sub> = 3:1) gave **5b** (65 mg, 86%) as a yellow solid.

<sup>1</sup>H NMR (500 MHz, CDCl<sub>3</sub>):  $\delta$  7.56–7.67 (m, 4H), 7.80 (d,  $J$  = 8.6 Hz, 2H), 7.83 (d,  $J$  = 8.4 Hz, 2H), 7.93 (d,  $J$  = 8.3 Hz, 2H), 7.98–8.06 (m, 4H), 8.55 (s, 1H), 9.21 (d,  $J$  = 8.2 Hz, 2H), 10.96 (s, 1H). <sup>13</sup>C NMR (126 MHz, CDCl<sub>3</sub>):  $\delta$  125.9, 126.5, 126.7, 127.0, 127.3, 127.4, 127.5, 127.76, 127.79, 127.82, 128.7, 128.9, 130.4, 131.3, 131.6, 133.8. IR (neat):  $\nu$  3047, 1153, 924, 881, 825, 739 cm<sup>-1</sup>. HRMS (APCI+):  $m/z$  Calcd. for C<sub>30</sub>H<sub>19</sub> [M + H]<sup>+</sup>: 379.1481; Found: 379.1497.

Spectral data for this compound showed good agreement with literature data [12].

### Naphtho[2,1-*b*]benzofuran (**9a**)

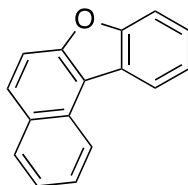

Compound **9a** was synthesized by the method described for compound **1a** using acetal **11a** (46 mg, 0.16 mmol), trifluoromethanesulfonic acid (2.4 mg, 16  $\mu$ mol), and HFIP (0.5 mL) at 0 °C for 40 min. Purification by silica gel column chromatography (hexane/CH<sub>2</sub>Cl<sub>2</sub> = 3:1) gave **9a** (34 mg, 96%) as a pale yellow solid.

<sup>1</sup>H NMR (500 MHz, CDCl<sub>3</sub>):  $\delta$  7.43–7.54 (m, 3H), 7.67–7.71 (m, 2H), 7.74 (d,  $J$  = 8.9 Hz, 1H), 7.89 (d,  $J$  = 8.9 Hz, 1H), 7.99 (d,  $J$  = 8.2 Hz, 1H), 8.36 (d,  $J$  = 7.2 Hz, 1H), 8.59 (d,  $J$  = 8.3 Hz, 1H). <sup>13</sup>C NMR (126 MHz, CDCl<sub>3</sub>):  $\delta$  111.9, 112.7, 117.3, 121.9, 123.1, 123.4, 124.4, 124.9, 125.9, 127.1, 128.5, 129.1, 129.2, 130.4, 154.3, 155.9.

Spectral data for this compound showed good agreement with literature data [13].



### Benzo[*b*]naphtho[1,2-*d*]thiophene (**9b**)

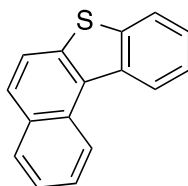

Compound **9b** was synthesized by the method described for compound **1a** using acetal **11b** (88 mg, 0.30 mmol), trifluoromethanesulfonic acid (4.9 mg, 33  $\mu$ mol), and HFIP (1.0 mL) at 0 °C for 40 min. Purification by silica gel column chromatography (hexane/CH<sub>2</sub>Cl<sub>2</sub> = 3:1) gave **9b** (61 mg, 88%) as a pale yellow solid.

<sup>1</sup>H NMR (500 MHz, CDCl<sub>3</sub>):  $\delta$  7.45 (dd,  $J$  = 8.1, 7.0 Hz, 1H), 7.51–7.56 (m, 2H), 7.74 (ddd,  $J$  = 8.4, 7.0, 1.2 Hz, 1H), 7.81 (d,  $J$  = 8.6 Hz, 1H), 7.85 (d,  $J$  = 8.6 Hz, 1H), 7.94–7.97 (m, 2H), 8.80 (d,  $J$  = 8.3 Hz, 1H), 8.95 (d,  $J$  = 8.5 Hz, 1H). <sup>13</sup>C NMR (126 MHz, CDCl<sub>3</sub>):  $\delta$  121.0, 123.12, 123.14, 124.66, 124.74, 124.8, 125.1, 127.1, 127.8, 129.0, 129.4, 130.6, 131.9, 136.7, 138.6, 139.7.

Spectral data for this compound showed good agreement with literature data [14].

### 7-(4-Methylbenzenesulfonyl)-7*H*-benzo[*c*]carbazole (**9c**)

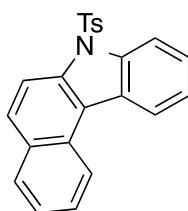

Compound **9c** was synthesized by the method described for compound **1a** using acetal **11c** (87 mg, 0.20 mmol), trifluoromethanesulfonic acid (3.0 mg, 20  $\mu$ mol), and HFIP (0.7 mL) at 0 °C for 40 min. Purification by silica gel column chromatography (hexane/EtOAc = 10:1) gave **9c** (69 mg, 93%) as a pale yellow solid.

<sup>1</sup>H NMR (500 MHz, CDCl<sub>3</sub>):  $\delta$  2.18 (s, 3H), 7.02 (d,  $J$  = 8.5 Hz, 2H), 7.48–7.53 (m, 3H), 7.64–7.68 (m, 3H), 7.93 (d,  $J$  = 9.2 Hz, 1H), 7.98 (d,  $J$  = 8.2 Hz, 1H), 8.44 (d,  $J$  = 7.7

Hz, 1H), 8.51 (d,  $J = 8.4$  Hz, 1H), 8.59 (d,  $J = 9.2$  Hz, 1H), 8.68 (d,  $J = 8.4$  Hz, 1H).  $^{13}\text{C}$  NMR (126 MHz,  $\text{CDCl}_3$ ):  $\delta$  21.3, 114.8, 115.3, 119.8, 122.1, 123.4, 124.2, 124.8, 126.1, 126.3, 127.0, 127.2, 128.5, 128.7, 129.0, 129.6, 130.9, 134.9, 136.5, 138.1, 144.9. Spectral data for this compound showed good agreement with literature data. [15]

### Dinaphtho[2,1-*b*:1',2'-*d'*]furan (12a)

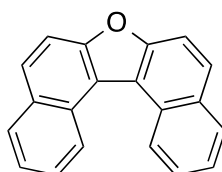

Compound **12a** was synthesized by the method described for compound **1a** using bisacetal **14a** (55 mg, 0.14 mmol), trifluoromethanesulfonic acid (3.7 mg, 25  $\mu\text{mol}$ ), and HFIP (0.5 mL) at room temperature for 40 min. Purification by silica gel column chromatography (hexane/ $\text{CH}_2\text{Cl}_2 = 2:1$ ) gave **12a** (34 mg, 90%) as a brown solid.

$^1\text{H}$  NMR (500 MHz,  $\text{CDCl}_3$ ):  $\delta$  7.56 (ddd,  $J = 8.0, 6.9, 1.0$  Hz, 1H), 7.72 (ddd,  $J = 8.5, 6.9, 1.4$  Hz, 1H), 7.80 (d,  $J = 8.8$  Hz, 1H), 7.92 (d,  $J = 8.8$  Hz, 1H), 8.04 (d,  $J = 8.0$  Hz, 1H), 9.13 (d,  $J = 8.5$  Hz, 1H).  $^{13}\text{C}$  NMR (126 MHz,  $\text{CDCl}_3$ ):  $\delta$  112.7, 119.4, 124.4, 125.6, 126.1, 128.3, 128.6, 129.5, 131.2, 154.3.

Spectral data for this compound showed good agreement with literature data [16].

### Dinaphtho[2,1-*b*:1',2'-*d'*]thiophene (12b)

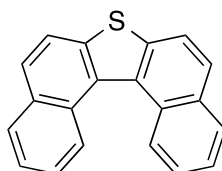

Compound **12b** was synthesized by the method described for compound **1a** using bisacetal **14b** (116 mg, 0.28 mmol), trifluoromethanesulfonic acid (4.5 mg, 30  $\mu\text{mol}$ ),

and HFIP (1.0 mL) at 0 °C for 40 min. Purification by silica gel column chromatography (hexane/EtOAc = 5:1) gave **12b** (73 mg, 90%) as a brown solid.

$^1\text{H}$  NMR (500 MHz,  $\text{CDCl}_3$ ):  $\delta$  7.56–7.58 (m, 4H), 7.92 (d,  $J$  = 8.6 Hz, 2H), 7.95 (d,  $J$  = 8.6 Hz, 2H), 8.02–8.04 (m, 2H), 8.86–8.88 (m, 2H).  $^{13}\text{C}$  NMR (126 MHz,  $\text{CDCl}_3$ ):  $\delta$  120.8, 124.9, 125.2, 126.1, 127.4, 128.7, 129.9, 131.4, 132.1, 138.5.

Spectral data for this compound showed good agreement with literature data [17].

### 7-(4-Methylbenzenesulfonyl)-7H-dibenzo[*c,g*]carbazole (**12c**)

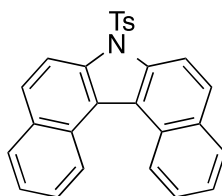

Compound **12c** was synthesized by the method described for compound **1a** using bisacetal **14c** (95 mg, 0.17 mmol), trifluoromethanesulfonic acid (3.8 mg, 25  $\mu\text{mol}$ ), and HFIP (0.6 mL) at room temperature for 40 min. Purification by silica gel column chromatography (hexane/ $\text{CH}_2\text{Cl}_2$  = 2:1) gave **12c** (64 mg, 88%) as a yellow solid.

mp: 174.2–176.1 °C.  $^1\text{H}$  NMR (500 MHz,  $\text{CDCl}_3$ ):  $\delta$  2.13 (s, 3H), 7.00 (d,  $J$  = 8.4 Hz, 2H), 7.52 (dd,  $J$  = 8.1, 7.0 Hz, 2H), 7.56 (dd,  $J$  = 8.4, 7.0 Hz, 2H), 7.68 (d,  $J$  = 8.5 Hz, 2H), 7.94 (d,  $J$  = 9.1 Hz, 2H), 7.98 (d,  $J$  = 8.1 Hz, 2H), 8.65 (d,  $J$  = 9.1 Hz, 2H), 8.90 (d,  $J$  = 8.5 Hz, 2H).  $^{13}\text{C}$  NMR (126 MHz,  $\text{CDCl}_3$ ):  $\delta$  21.4, 114.6, 121.7, 124.9, 125.5, 125.8, 126.3, 127.9, 128.1, 128.7, 129.7, 131.4, 135.1, 136.3, 145.0. IR (neat):  $\nu$  3050, 2927, 2854, 1595, 1516, 1444, 1381, 1348, 1246, 1196, 1188, 1173, 1163, 1099, 820, 806, 768, 744, 678, 663, 615, 565, 540  $\text{cm}^{-1}$ . HRMS (APCI+)  $m/z$  Calcd. for  $\text{C}_{27}\text{H}_{20}\text{NO}_2\text{S}$   $[\text{M} + \text{H}]^+$ : 422.1209; Found: 422.1206.

### Benzo[*b*]benzo[5,6]phenanthro[4,3-*d*]thiophene (**15**)

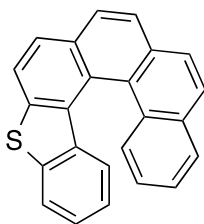

Compound **15** was synthesized by the method described for compound **1a** using bisacetal **18** (94 mg, 0.21 mmol), trifluoromethanesulfonic acid (6.2 mg, 41  $\mu$ mol) and HFIP (0.9 mL) at room temperature for 40 min. Purification by silica gel column chromatography (hexane/ $\text{CH}_2\text{Cl}_2$  = 3:1) to give **15** (43 mg, 63%) as a yellow solid.

mp: 175.4–177.0 °C.  $^1\text{H}$  NMR (500 MHz,  $\text{CDCl}_3$ ):  $\delta$  6.77 (dd,  $J$  = 8.2, 7.2 Hz, 1H), 6.91 (d,  $J$  = 8.3 Hz, 1H), 7.02 (dd,  $J$  = 8.2, 7.5 Hz, 1H), 7.23 (dd,  $J$  = 7.9, 7.2 Hz, 1H), 7.42 (dd,  $J$  = 7.7, 7.5 Hz, 1H), 7.85–7.87 (m, 2H), 7.90–8.00 (m, 6H), 8.05 (d,  $J$  = 8.4 Hz, 1H).  $^{13}\text{C}$  NMR (126 MHz,  $\text{CDCl}_3$ ):  $\delta$  121.5, 122.1, 122.4, 124.7, 125.3, 125.5, 125.6, 125.8, 125.9, 126.1, 126.3, 126.9, 127.4, 127.7, 128.1, 128.6, 130.2, 131.4, 131.51, 131.54, 132.1, 136.1, 138.4, 139.4. IR (neat):  $\nu$  3047, 1577, 1485, 1442, 1401, 1363, 1336, 1307, 1246, 1217, 1193, 1136, 1120, 1066, 837, 744, 609, 519  $\text{cm}^{-1}$ . HRMS (APCI+)  $m/z$  Calcd. for  $\text{C}_{24}\text{H}_{15}\text{S}$  [ $\text{M} + \text{H}$ ] $^+$ : 335.0889; Found: 335.0897.

### 4. References

1. Weimar, M.; Dürner, G.; Bats, J. W.; Göbel, M. W. *J. Org. Chem.*, **2010**, *75*, 2718–2721.
2. Takahashi, I.; Hayashi, M.; Fujita, T.; Ichikawa, J. *Chem. Lett.*, **2017**, *46*, 392–394.
3. Xie, Z.; Yang, B.; Liu, L.; Li, M.; Lin, D.; Ma, Y.; Cheng, G.; Liu, S. *J. Phys. Org. Chem.*, **2005**, *18*, 962–973.

4. Nakakuki, Y.; Hirose, T.; Matsuda, K. *J. Am. Chem. Soc.*, **2018**, *140*, 15461–15469.
5. Fredrich, S.; Bonasera, A.; Valderrey, V.; Hecht, S. *J. Am. Chem. Soc.*, **2018**, *140*, 6432–6440.
6. Dhiman, S.; Mishra, U. K.; Ramasastry, S. S. V. *Angew. Chem. Int. Ed.*, **2016**, *55*, 7737–7741.
7. Yao, C.-H.; Song, J.-S.; Chen, C.-T.; Yeh, T.-K.; Hsieh, T.-C.; Wu, S.-H.; Huang, C.-Y.; Huang, Y.-L.; Wang, M.-H.; Liu, Y.-W.; Tsai, C.-H.; Kumar, C. R.; Lee, J.-C. *Eur. J. Med. Chem.*, **2012**, *55*, 32–38.
8. Rennison, D.; Bova, S.; Cavalli, M.; Ricchelli, F.; Zulian, A.; Hopkins, B.; Brimble, M. A. *Bioorg. Med. Chem.*, **2007**, *15*, 2963–2974.
9. Nielsen, C. B.; Bjørnholm, T. *Org. Lett.*, **2004**, *6*, 3381–3384.
10. Zonta, C.; Fabris, F.; De Lucchi, O. *Org. Lett.*, **2005**, *7*, 1003–1006.
11. Talele, H. R.; Chaudhary, A. R.; Patel, P. R.; Bedekar, A. V. *Arkivoc*, **2011**, *9*, 15–37.
12. Mallory, F. B.; Mallory, C. W.; Sen Loeb, S. E. *Tetrahedron Lett.*, **1985**, *26*, 3773–3776.
13. Nervig, C. S.; Waller, P. J.; Kalyani, D. *Org. Lett.*, **2012**, *14*, 4838–4841.
14. Rafiq, S. M.; Sivasakthikumar, R.; Mohanakrishnan, A. K. *Org. Lett.*, **2014**, *16*, 2720–2723.
15. Fan, X.; Yu, L.-Z.; Wei, Y.; Shi, M. *Org. Lett.*, **2017**, *19*, 4476–4479.
16. Ducos, P.; Liautard, V.; Robert, F.; Landais, Y. *Chem. Eur. J.*, **2015**, *21*, 11573–11578.
17. Sadorn, K.; Sinananwanich, W.; Areephong, J.; Nerungsi, C.; Wongma, C.; Pakawatchai, C.; Thongpanchang, T. *Tetrahedron Lett.*, **2008**, *49*, 4519–4521.

## 5. $^1\text{H}$ and $^{13}\text{C}$ NMR spectra

### [5]Helicene (1a)

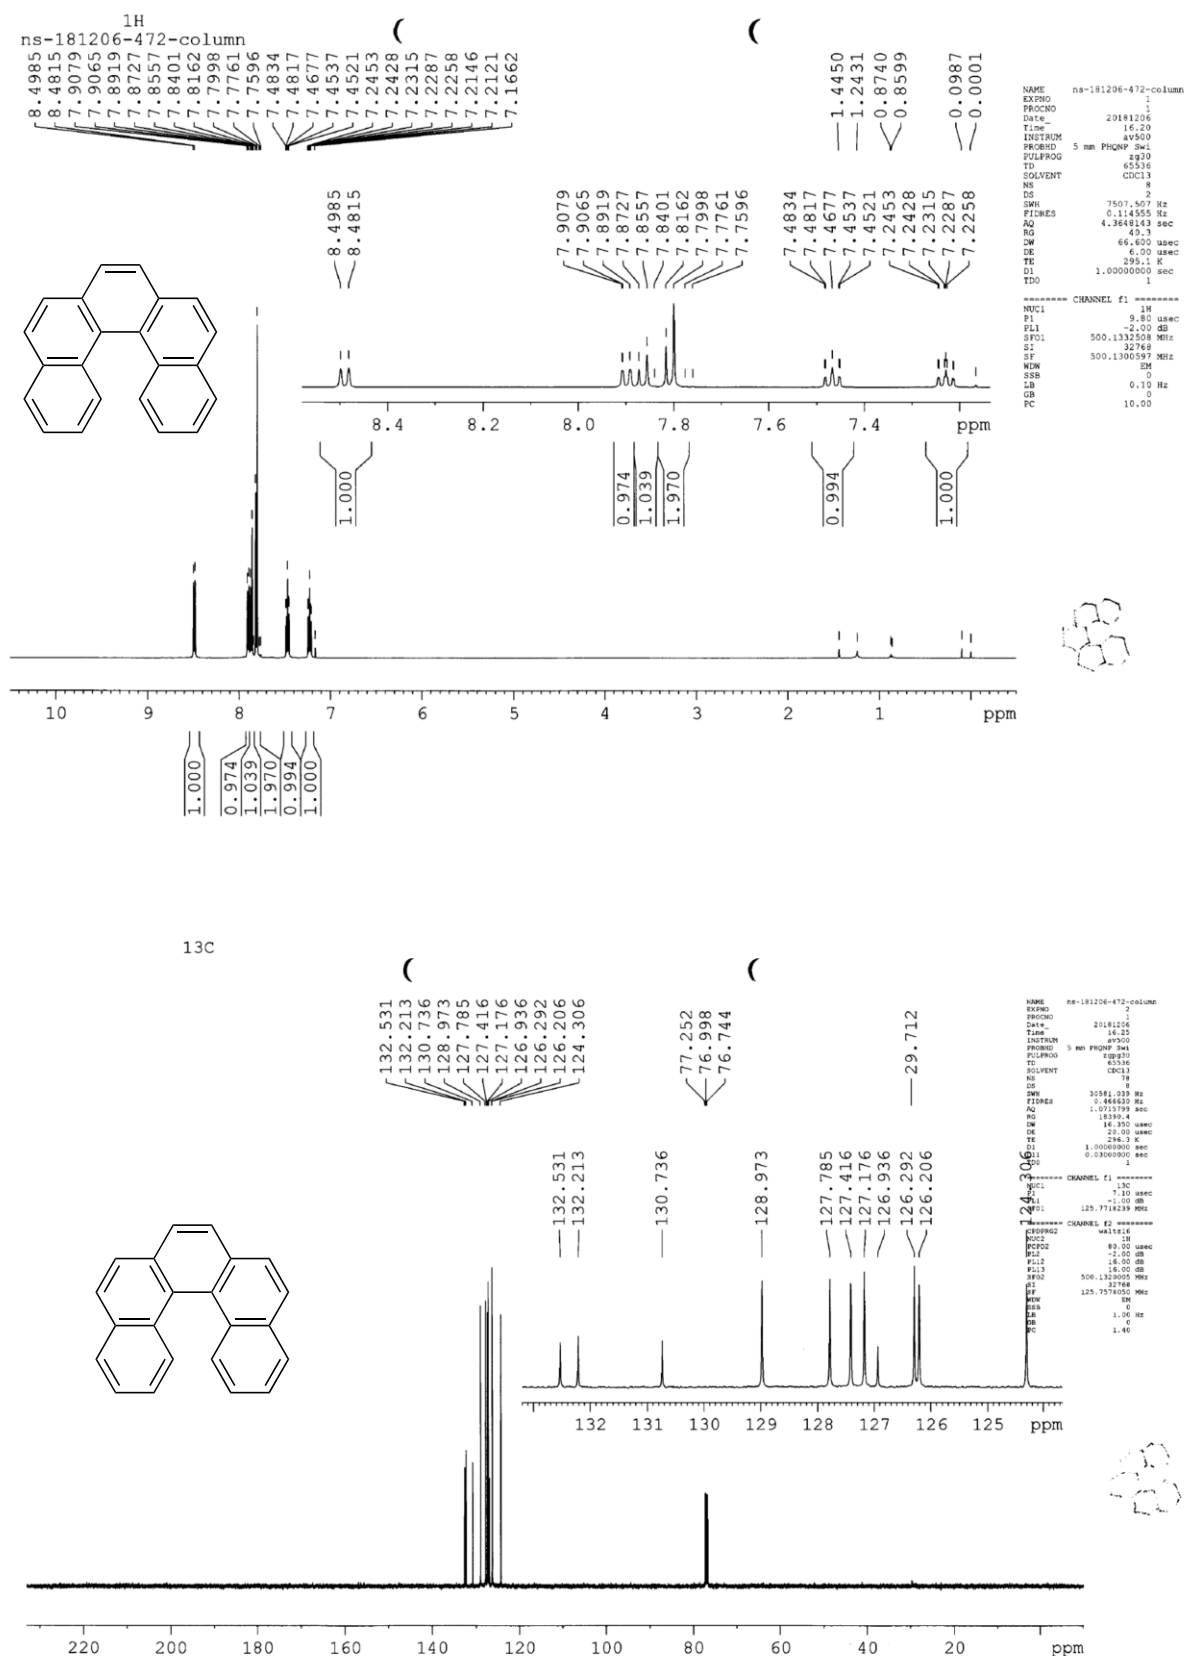

# [6]Helicene (1b)

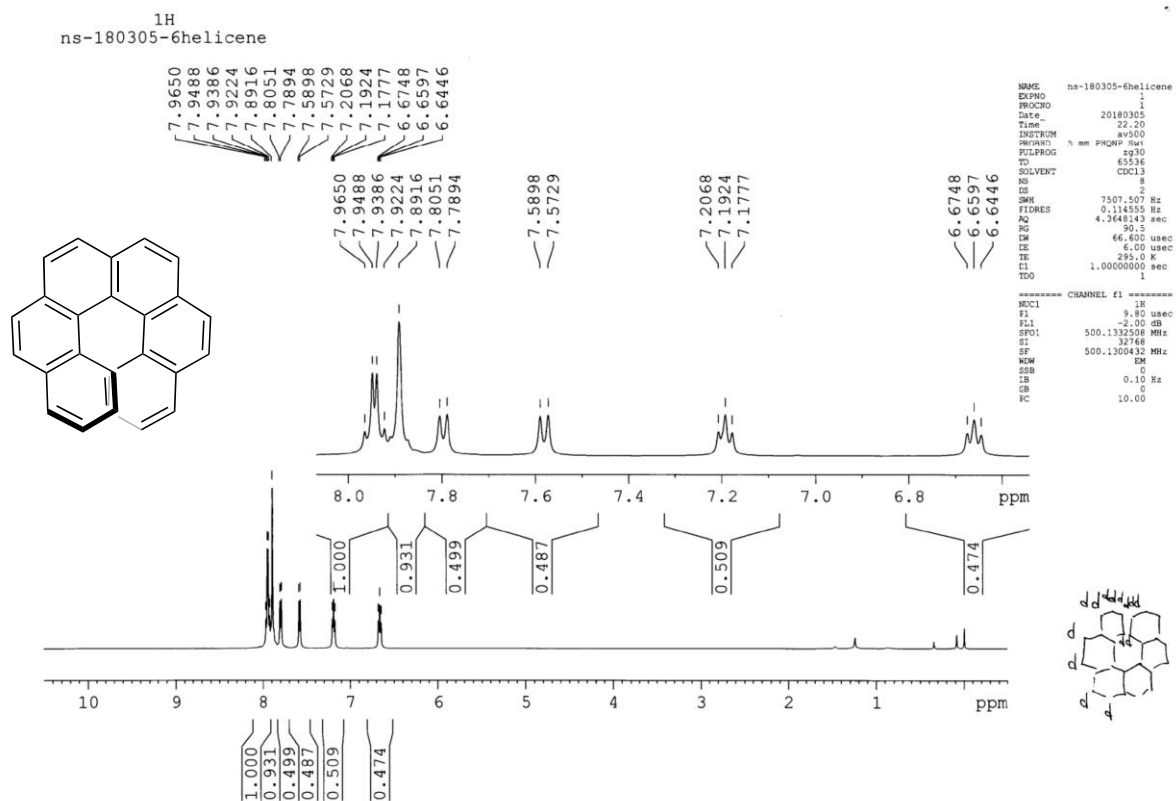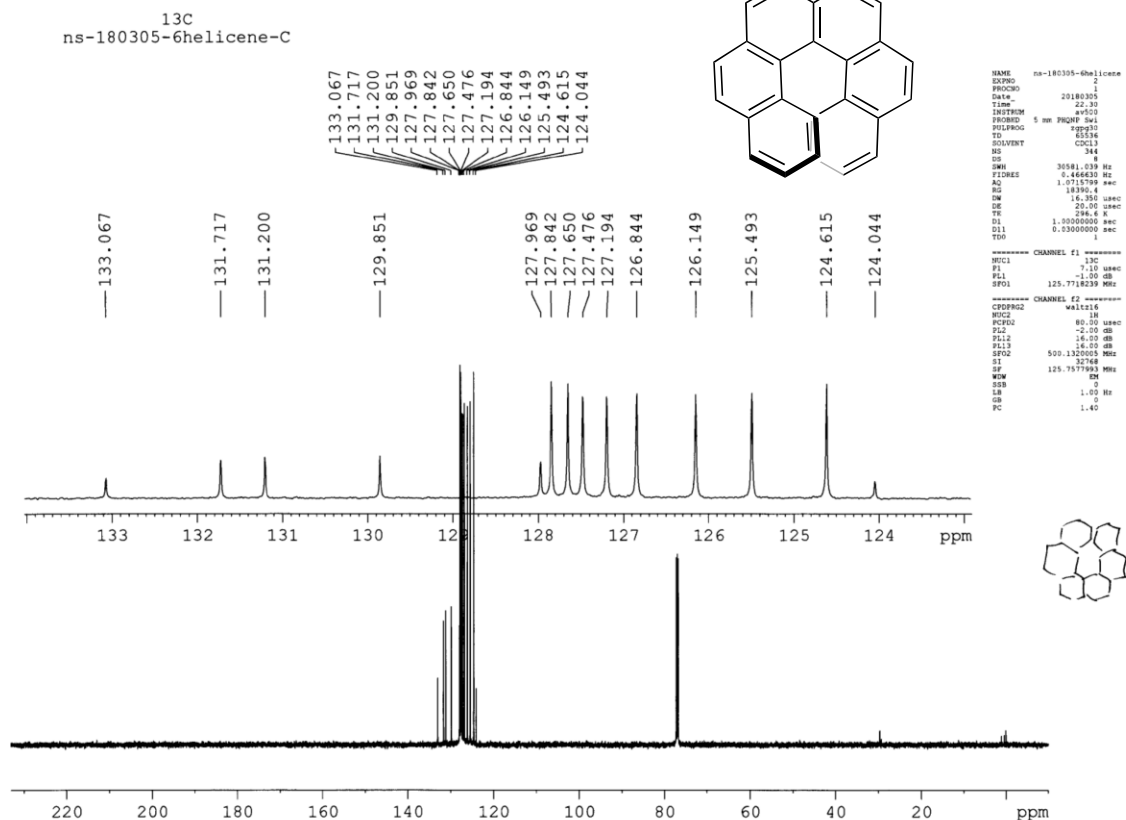

# Benzo[a]naphtho[1,2-k]tetraphene (5a)

<sup>1</sup>H  
ns-180304-shelicene

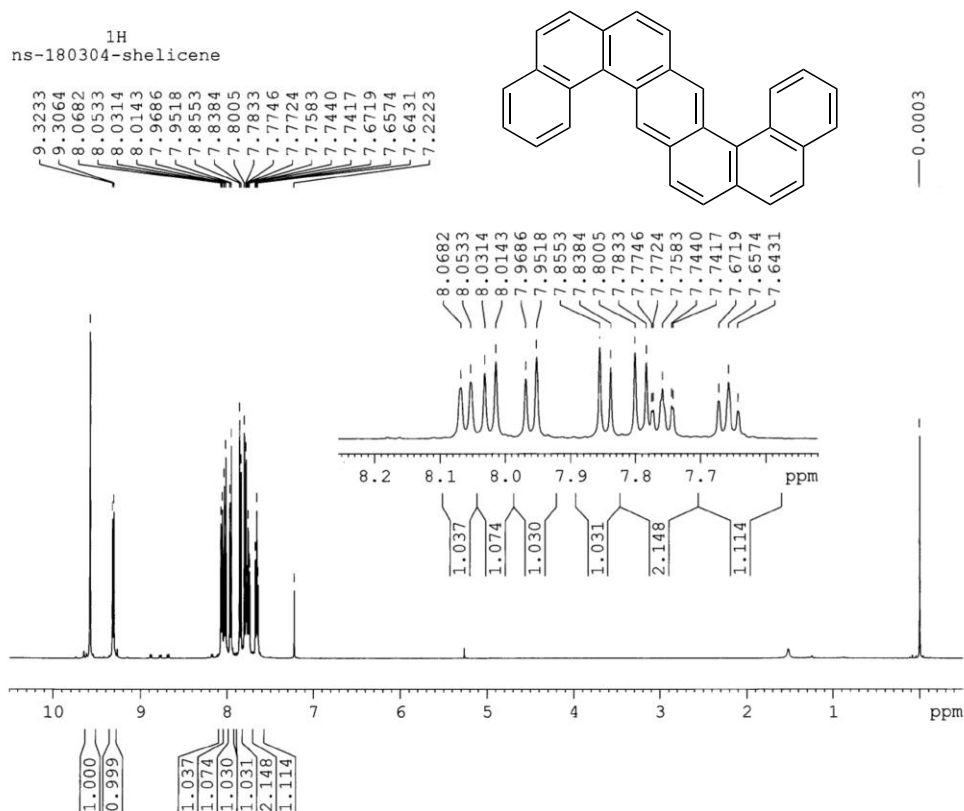

```
NAME      ns-180304-shelicene
EXPNO     1
PROCNO    1
Date_     20180305
Time      19.39
INSTRUM    av500
PROBHD     5 mm FQNP SW1
PULPROG    zg30
TD         65536
SOLVENT    CDCl3
NS         8
DS         2
SWH         7307.507 Hz
FIDRES     0.114555 Hz
AQ         4.3648143 sec
RG         114
DM         66.600 usec
DE         6.00 usec
TE         295.0 K
U1         1.00000000 sec
TD0        1
===== CHANNEL f1 =====
NUC1       1H
P1         9.80 usec
PL1        -2.00 dB
SFO1       500.1325258 MHz
SI         32768
SF         500.1300319 MHz
WDW         EM
SSB         0
LB         0.10 Hz
GB         0
PC         10.00
```

<sup>13</sup>C

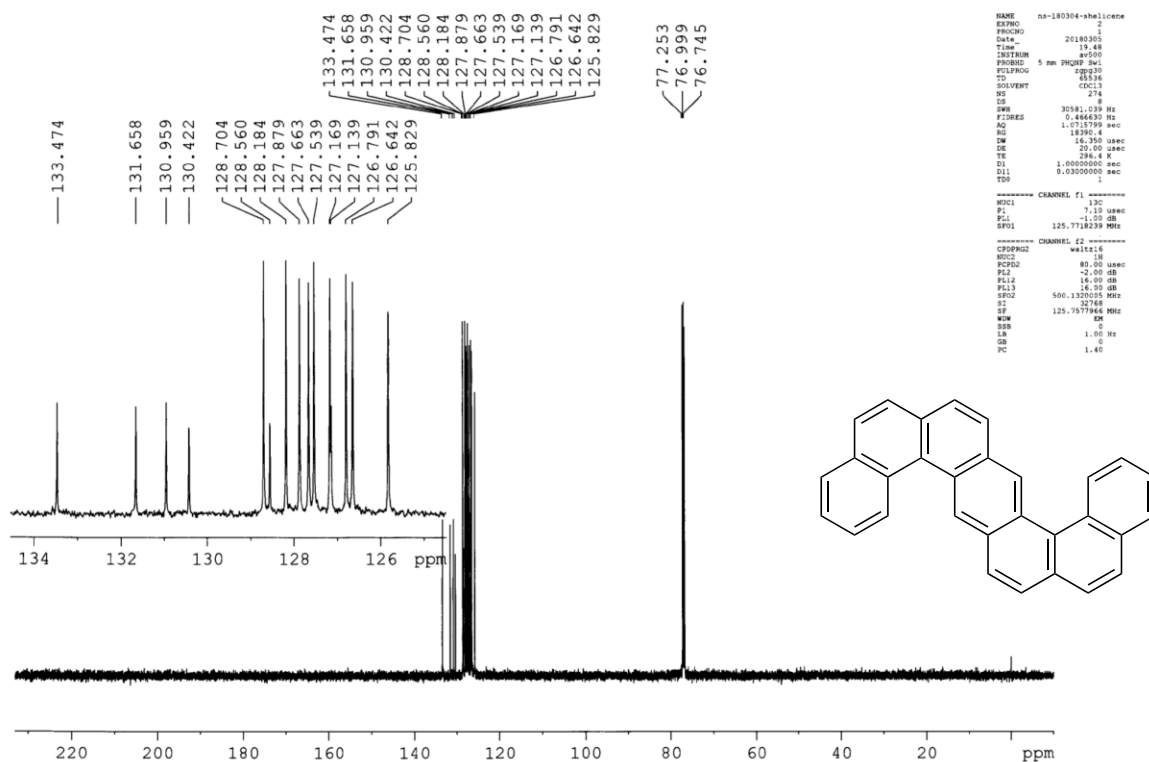

```
NAME      ns-180304-shelicene
EXPNO     2
PROCNO    1
Date_     20180305
Time      19.48
INSTRUM    av500
PROBHD     5 mm FQNP SW1
PULPROG    zgpg30
TD         65536
SOLVENT    CDCl3
NS         8
DS         2
SWH         20181.039 Hz
FIDRES     0.484632 Hz
AQ         1.0713799 sec
RG         18390.4
DM         16.300 usec
DE         6.00 usec
TE         294.4 K
U1         1.00000000 sec
D11        0.03000000 sec
TD0        1
===== CHANNEL f1 =====
NUC1       13C
P1         7.10 usec
PL1         -1.00 dB
SFO1       125.7718239 MHz
===== CHANNEL f2 =====
CPDPRG2    waltz16
NUC2       1H
PCPD2      80.00 usec
PL2        -2.00 dB
PL12       14.00 dB
PL13       14.00 dB
SFO2       500.1320005 MHz
SI         32768
SF         125.7677844 MHz
WDW         EM
SSB         0
LB         1.00 Hz
GB         0
PC         1.40
```



# Benzo[a]naphtho[2,1-m]tetraphene (5b)

<sup>1</sup>H  
ns-180311-Uhelicene-CDCl<sub>3</sub>

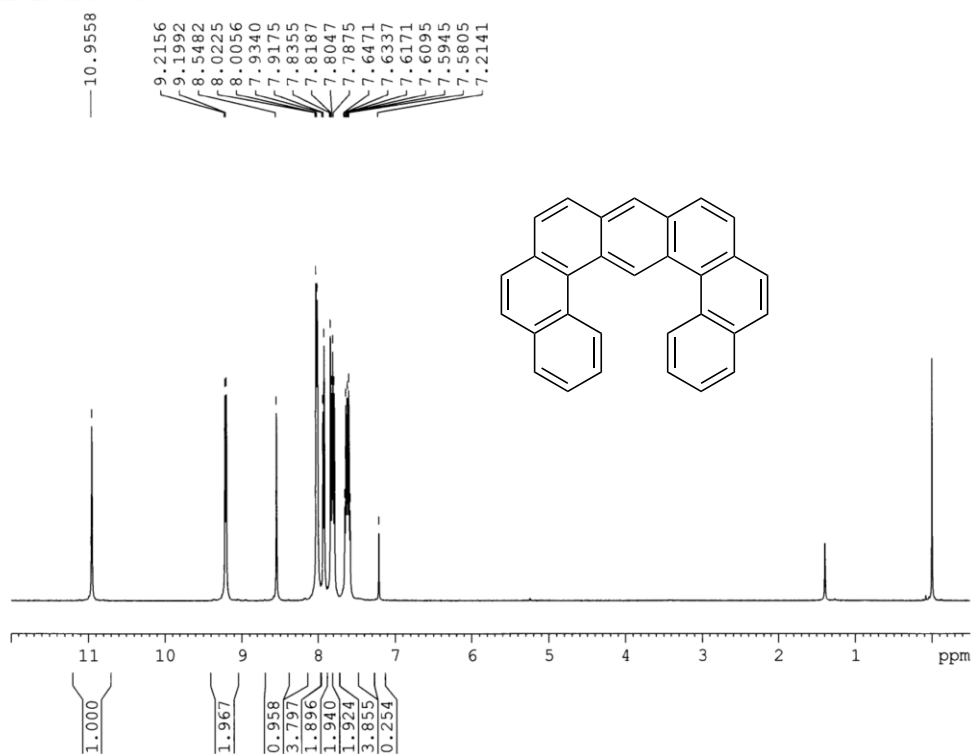

```
NAME ns-180311-Uhelicene-CDCl3
EXPNO 1
PROCNO 1
Date_ 20180311
Time 23.45
INSTRUM spect
PROBHD 5 mm PNPB
PULPROG zgpg30
TD 65536
SOLVENT CDCl3
NS 2
DS 2
SWH 7607.607 Hz
FIDRES 0.14855 Hz
AQ 4.3648143 sec
RG 381
DW 66.400 usec
DE 4.20 usec
TE 323.3 K
D1 1.00000000 sec
TDO 1
===== CHANNEL F1 =====
NUC1 1H
P1 9.80 usec
PL 0.00 dB
SFO1 500.132508 MHz
F2 277.48
SFO2 500.132508 MHz
WDW EM
SSB 0
LB 0.10 Hz
GB 0
PC 19.00
```

<sup>13</sup>C  
ns-180311-Uhelicene-CDCl<sub>3</sub>-C

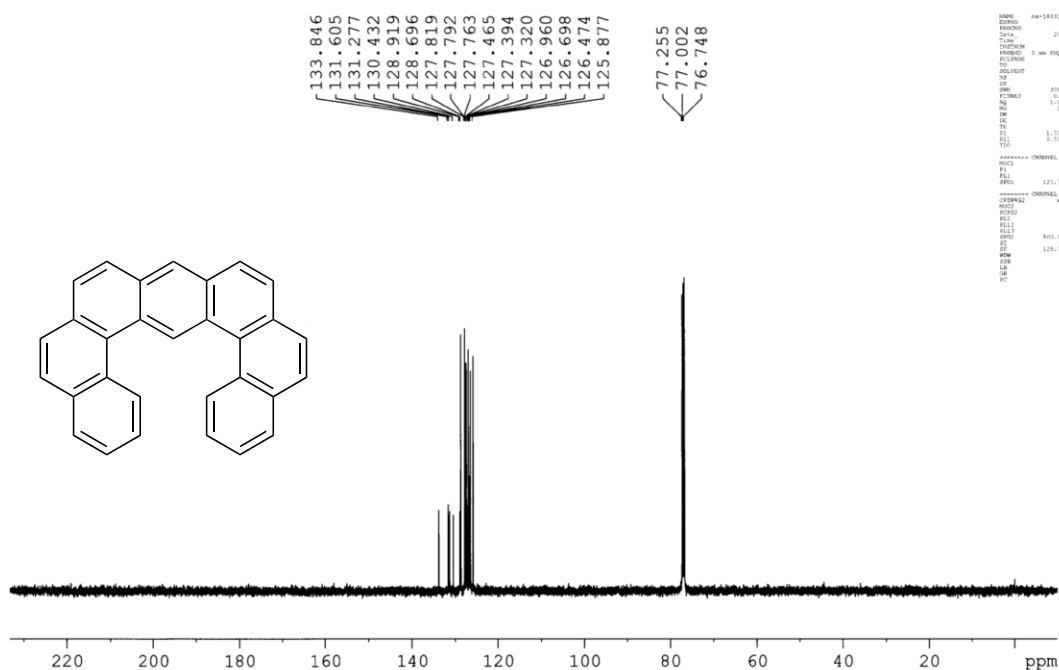

```
NAME ns-180311-Uhelicene-CDCl3-C
EXPNO 1
PROCNO 1
Date_ 20180311
Time 23.45
INSTRUM spect
PROBHD 5 mm PNPB
PULPROG zgpg30
TD 65536
SOLVENT CDCl3
NS 2
DS 2
SWH 10100.610 Hz
FIDRES 0.444820 Hz
AQ 1.071719 sec
RG 381
DW 15.000 usec
DE 4.20 usec
TE 323.3 K
D1 1.00000000 sec
TDO 1
===== CHANNEL F1 =====
NUC1 13C
P1 1.50 usec
PL 0.00 dB
SFO1 125.761180 MHz
===== CHANNEL F2 =====
NAME ns-180311-Uhelicene-CDCl3-C
EXPNO 1
PROCNO 1
Date_ 20180311
Time 23.45
INSTRUM spect
PROBHD 5 mm PNPB
PULPROG zgpg30
TD 65536
SOLVENT CDCl3
NS 2
DS 2
SWH 10100.610 Hz
FIDRES 0.444820 Hz
AQ 1.071719 sec
RG 381
DW 15.000 usec
DE 4.20 usec
TE 323.3 K
D1 1.00000000 sec
TDO 1
===== CHANNEL F1 =====
NUC1 13C
P1 1.50 usec
PL 0.00 dB
SFO1 125.761180 MHz
===== CHANNEL F2 =====
NAME ns-180311-Uhelicene-CDCl3-C
EXPNO 1
PROCNO 1
Date_ 20180311
Time 23.45
INSTRUM spect
PROBHD 5 mm PNPB
PULPROG zgpg30
TD 65536
SOLVENT CDCl3
NS 2
DS 2
SWH 10100.610 Hz
FIDRES 0.444820 Hz
AQ 1.071719 sec
RG 381
DW 15.000 usec
DE 4.20 usec
TE 323.3 K
D1 1.00000000 sec
TDO 1
===== CHANNEL F1 =====
NUC1 13C
P1 1.50 usec
PL 0.00 dB
SFO1 125.761180 MHz
===== CHANNEL F2 =====
```

# Naphtho[2,1-b]benzofuran (9a)

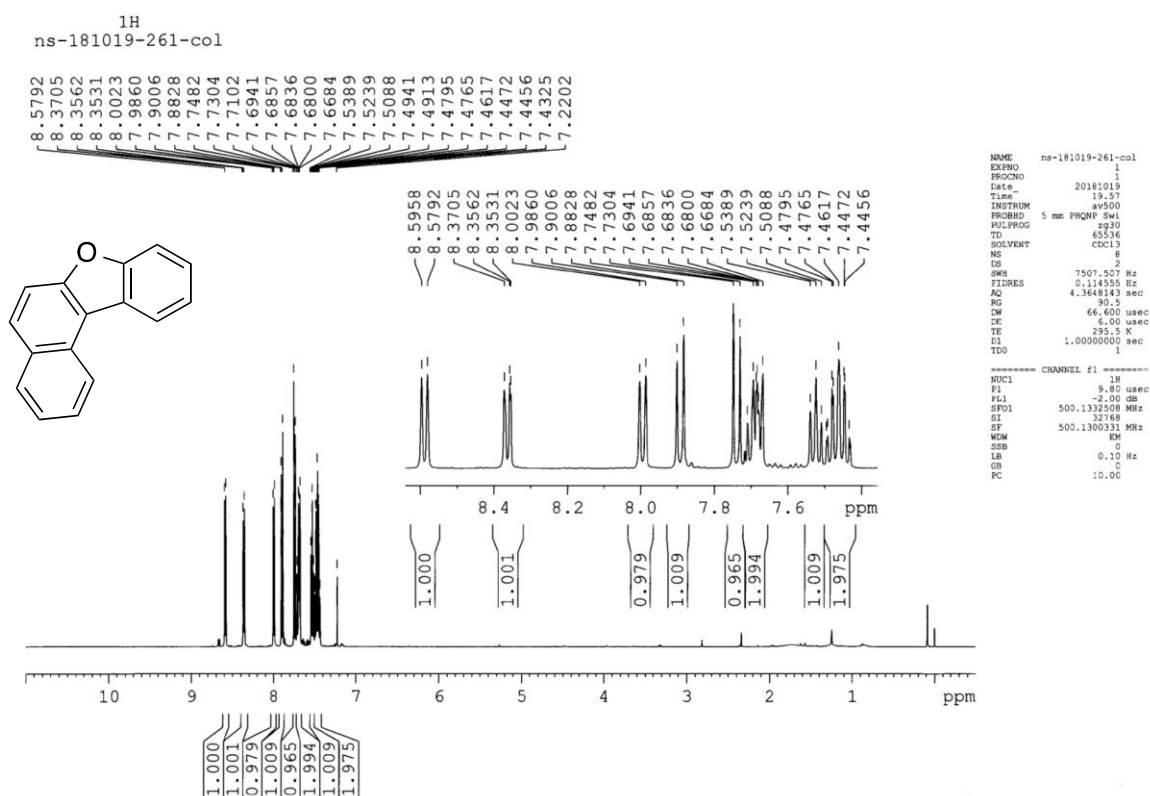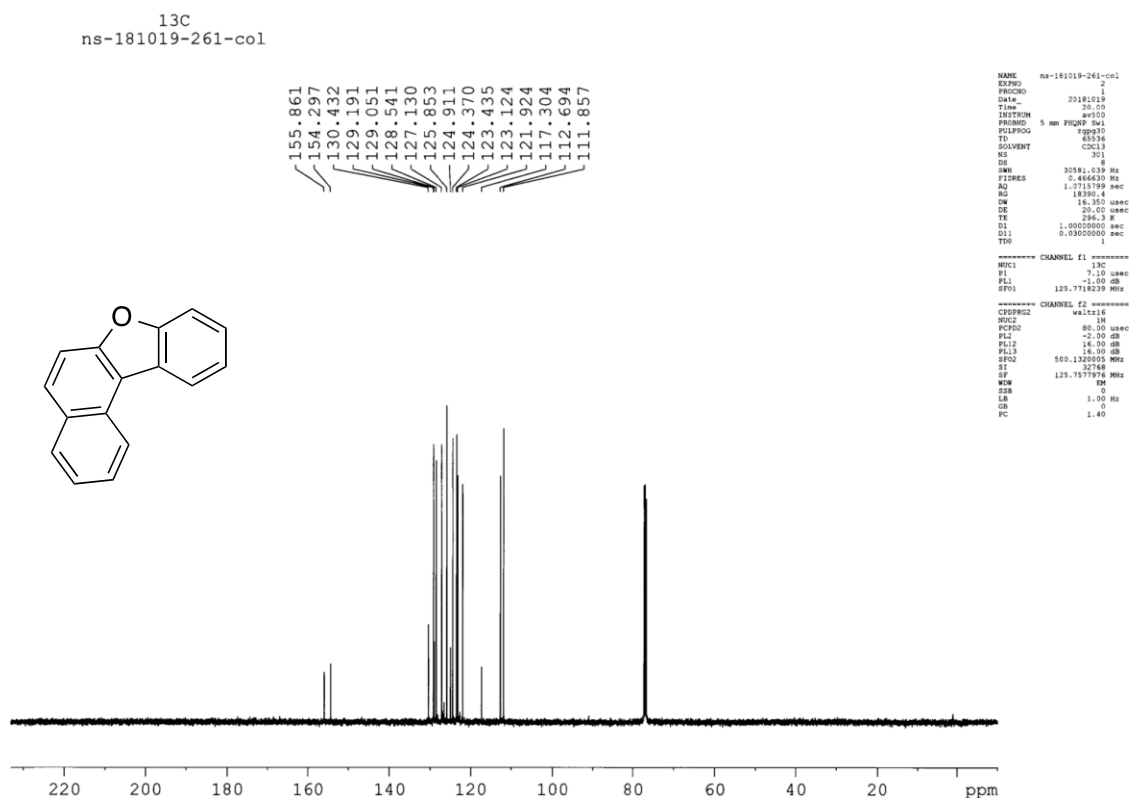

# Benzo[b]naphtho[1,2-d]thiophene (9b)

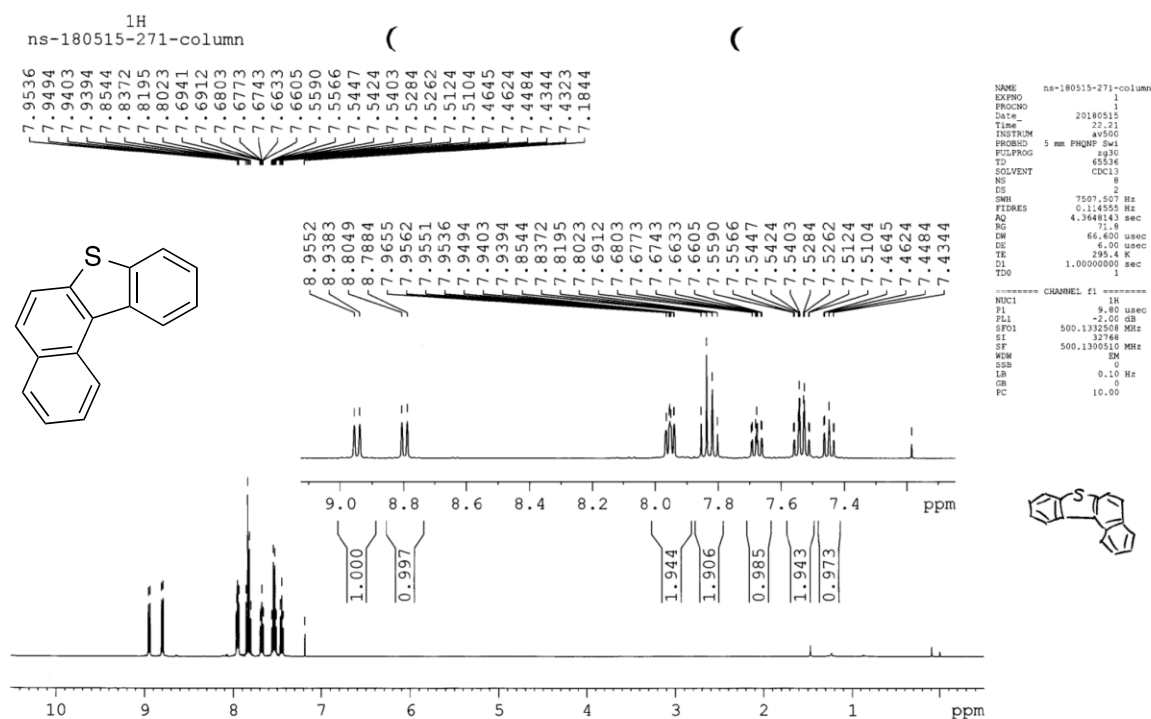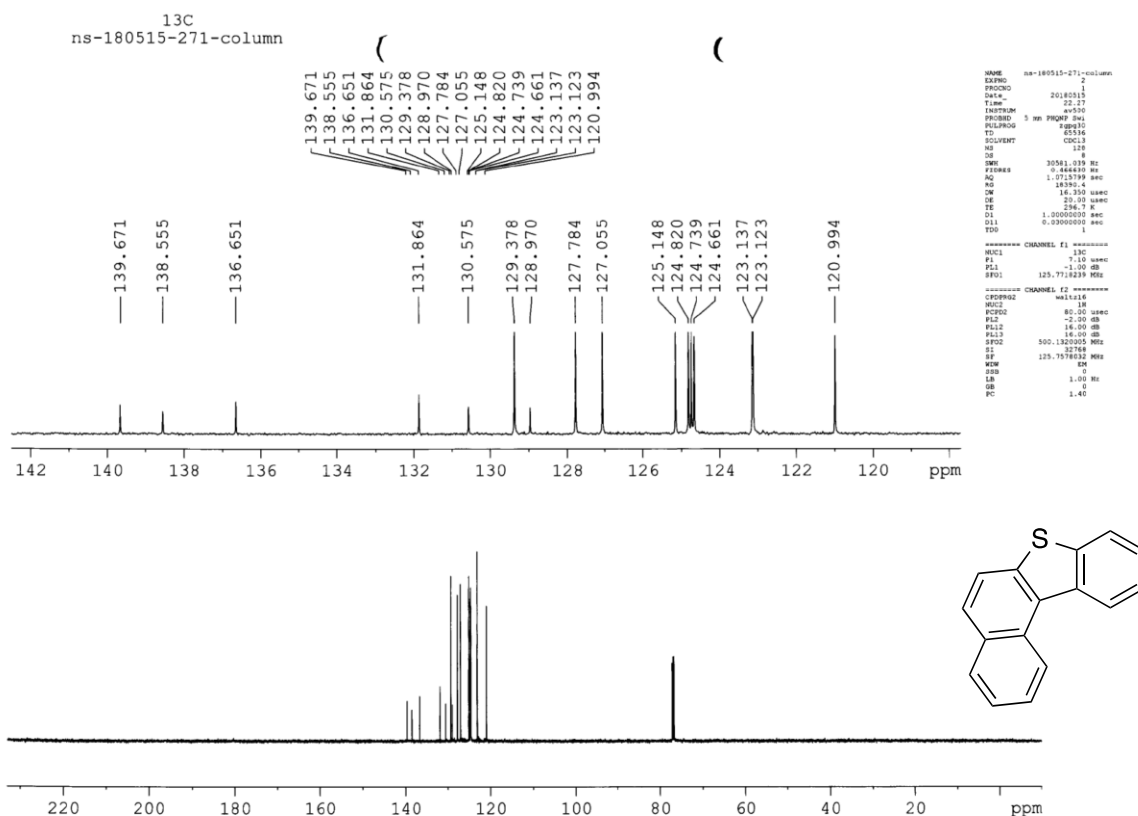

# 7-(4-Methylbenzenesulfonyl)-7H-benzo[c]carbazole (9c)

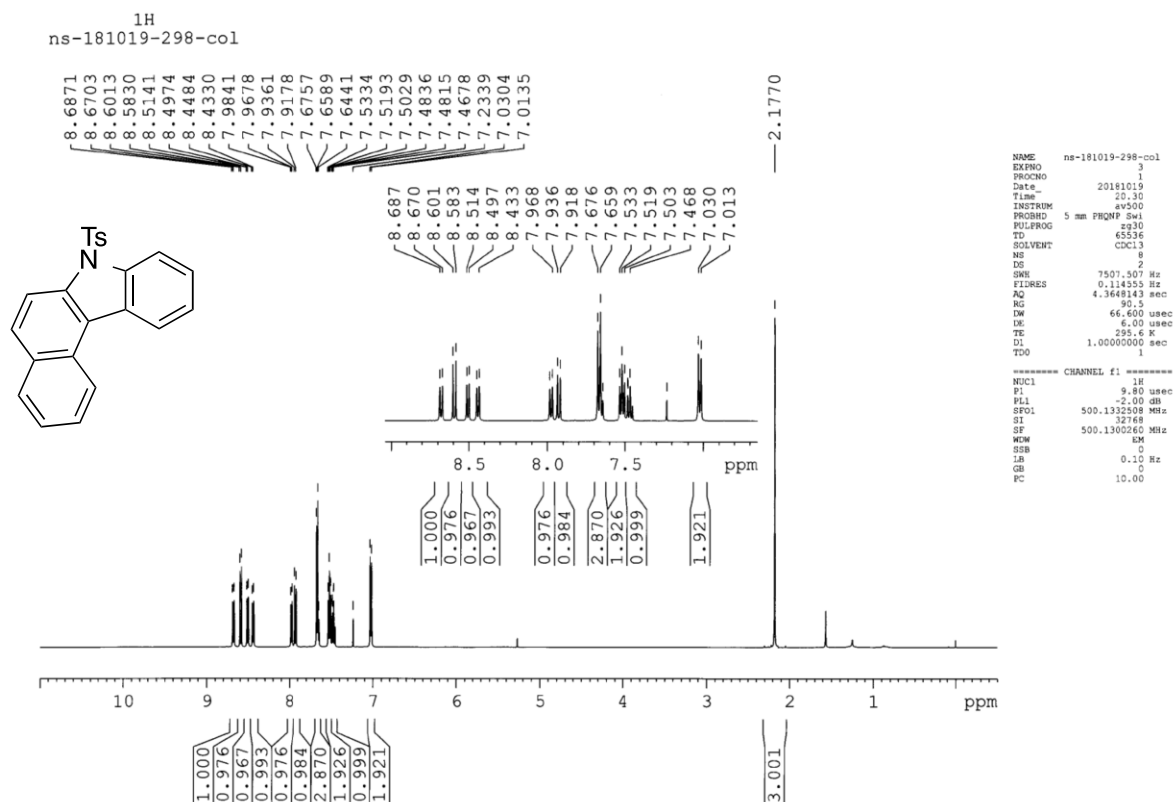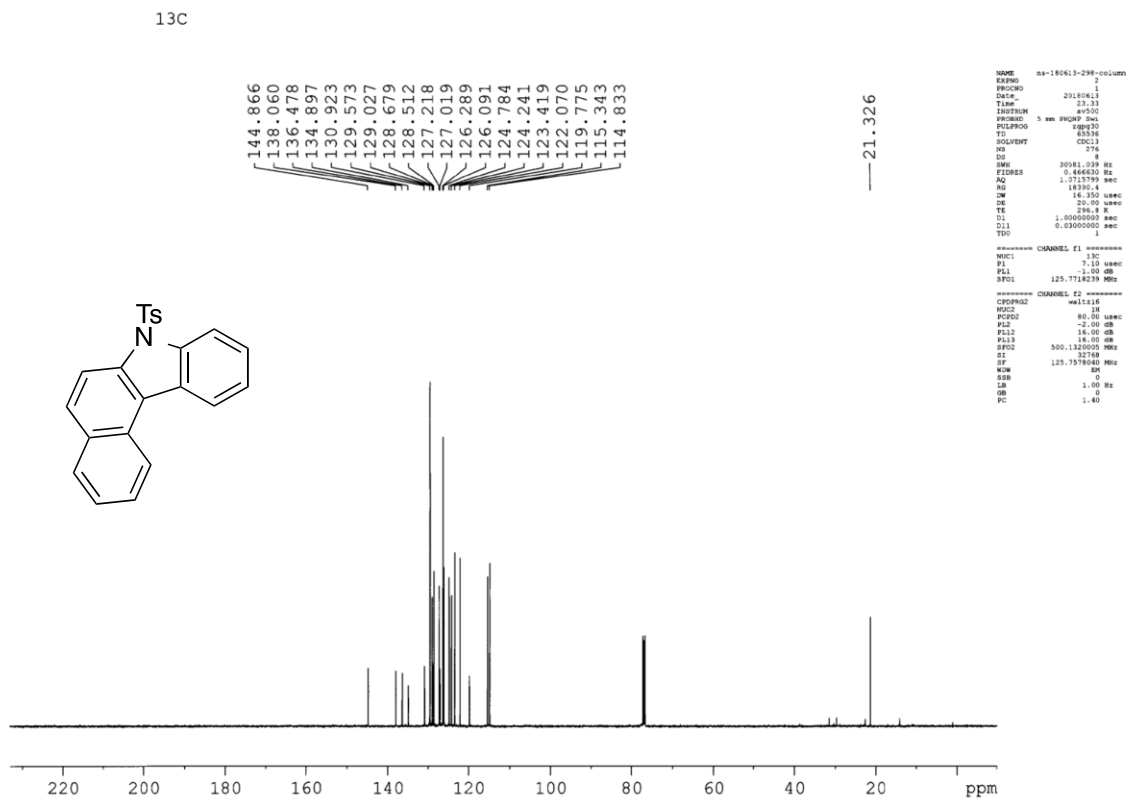

# Dinaphtho[2,1-b:1',2'-d]furan (12a)

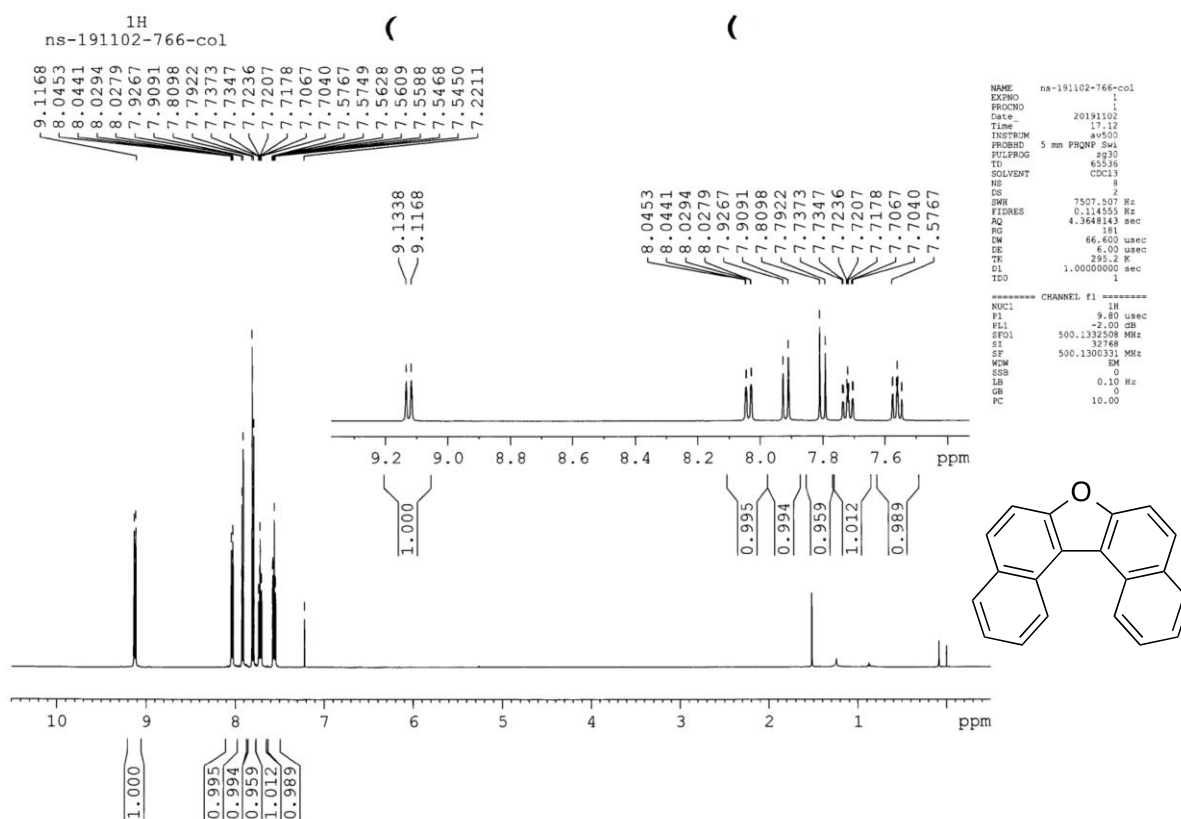

13C

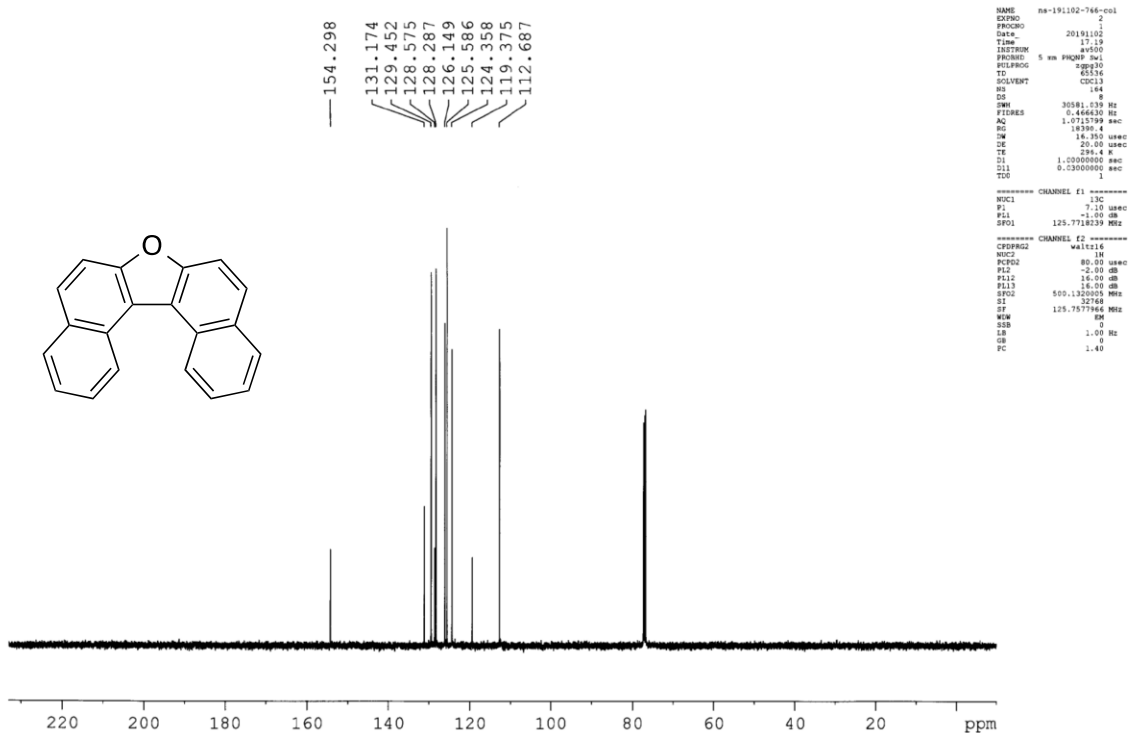

### Dinaphtho[2,1-*b*:1',2'-*d*]thiophene (12b)

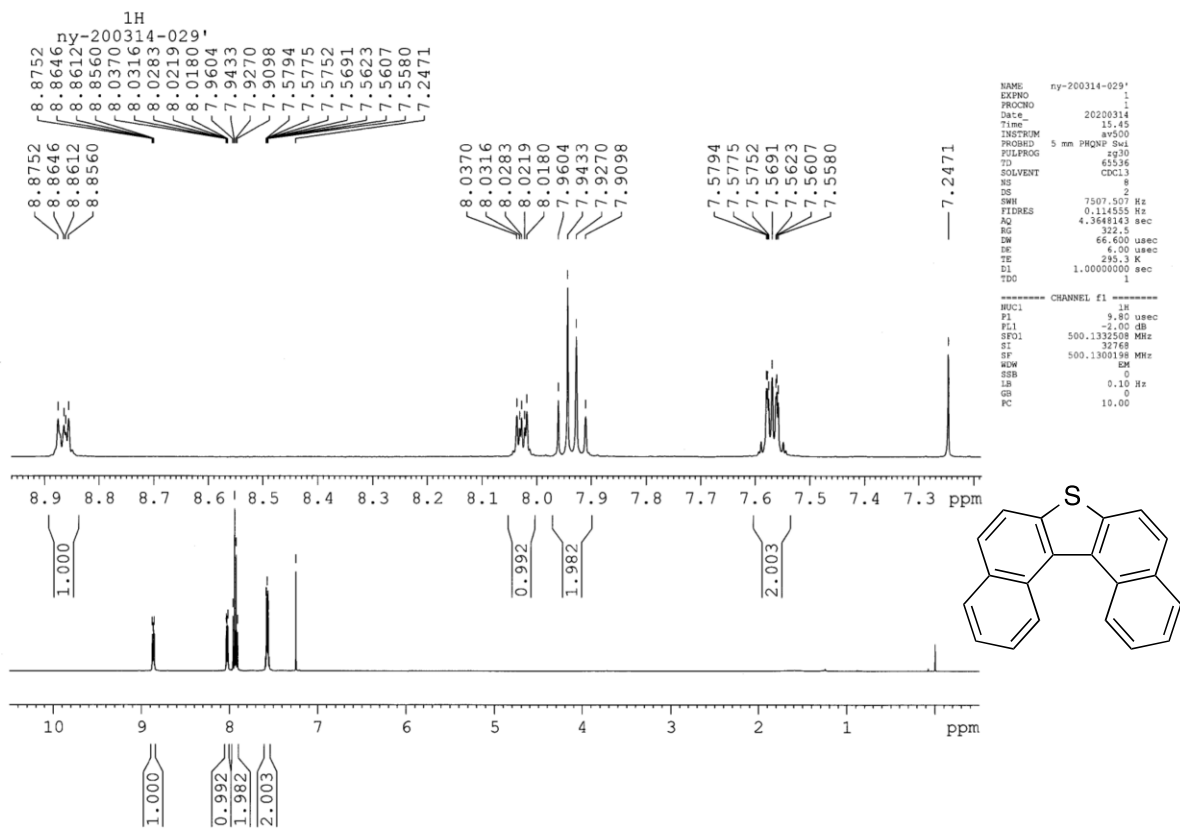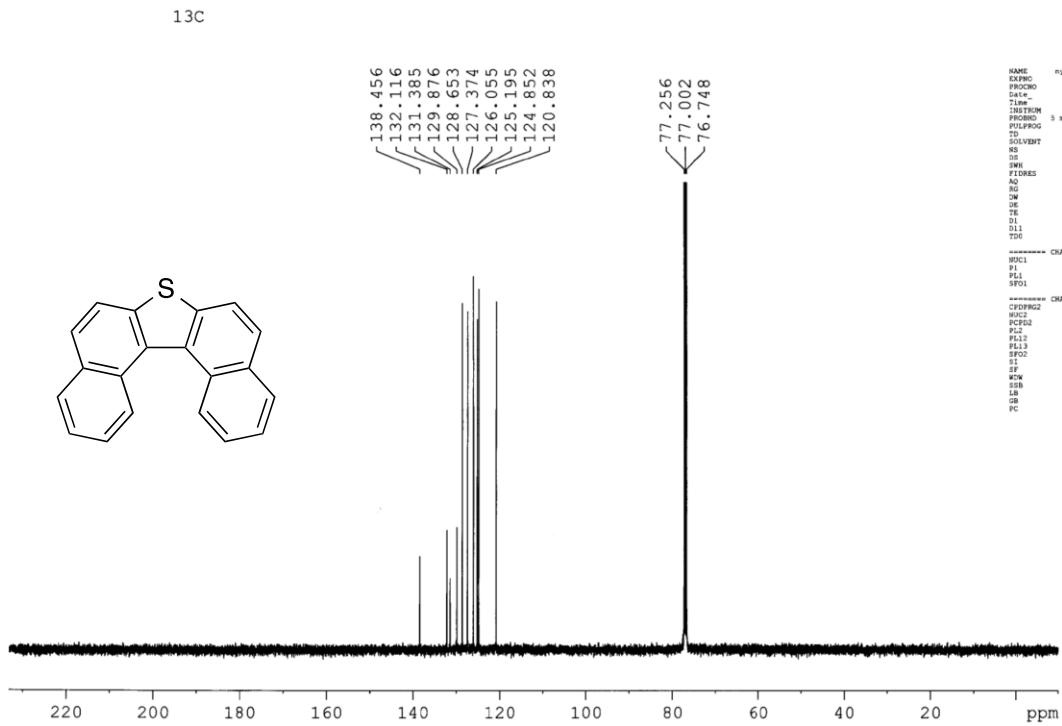

# 7-(4-Methylbenzenesulfonyl)-7H-dibenzo[c,g]carbazole (12c)

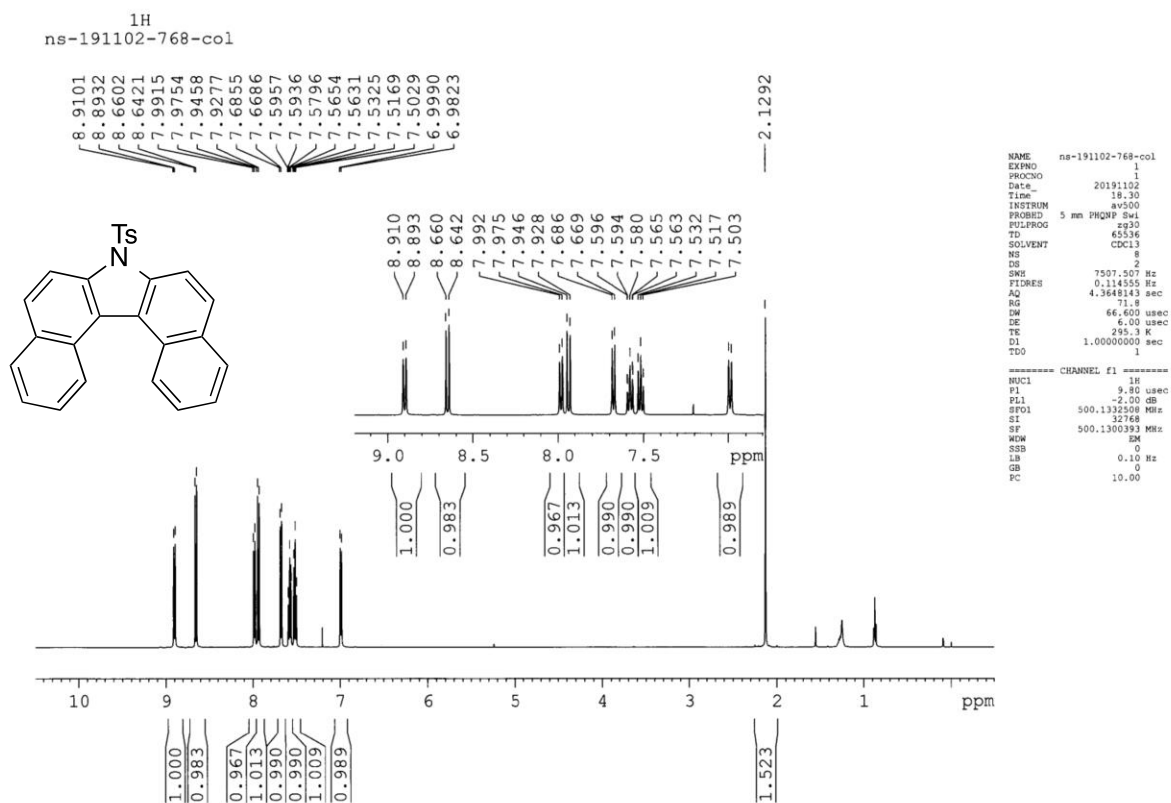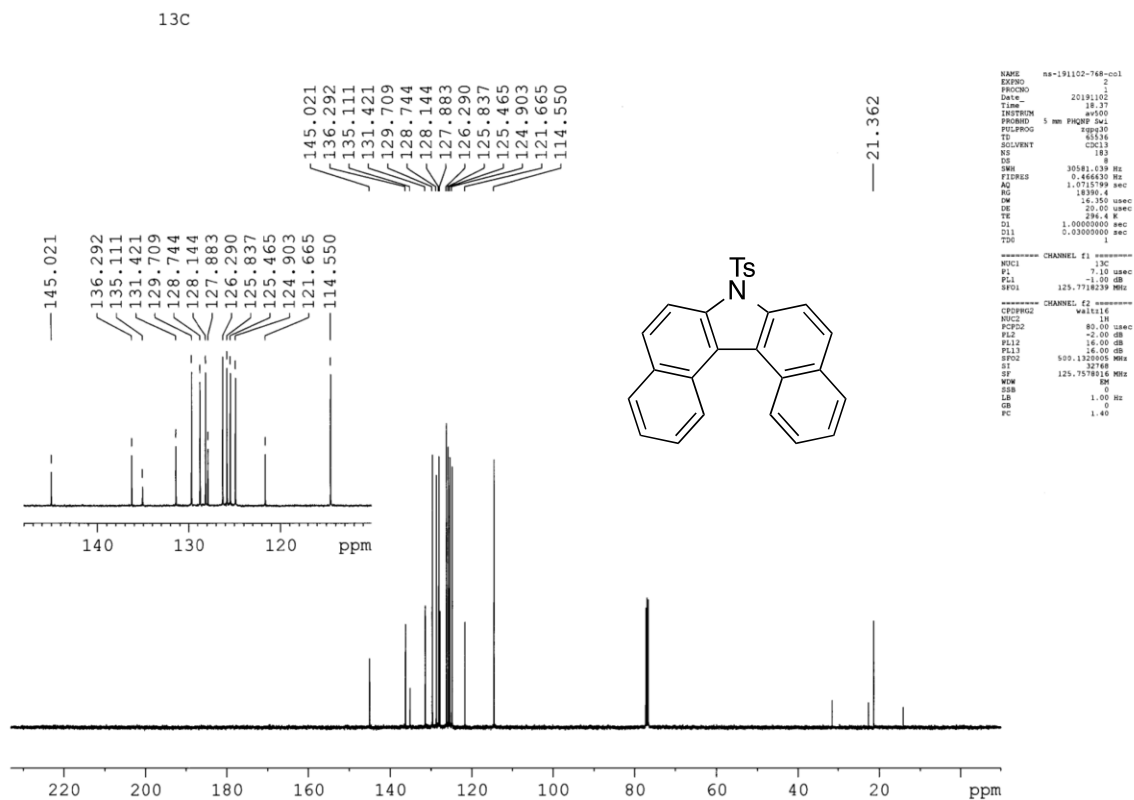

# Benzo[b]benzo[5,6]phenanthro[4,3-d]thiophene (15)

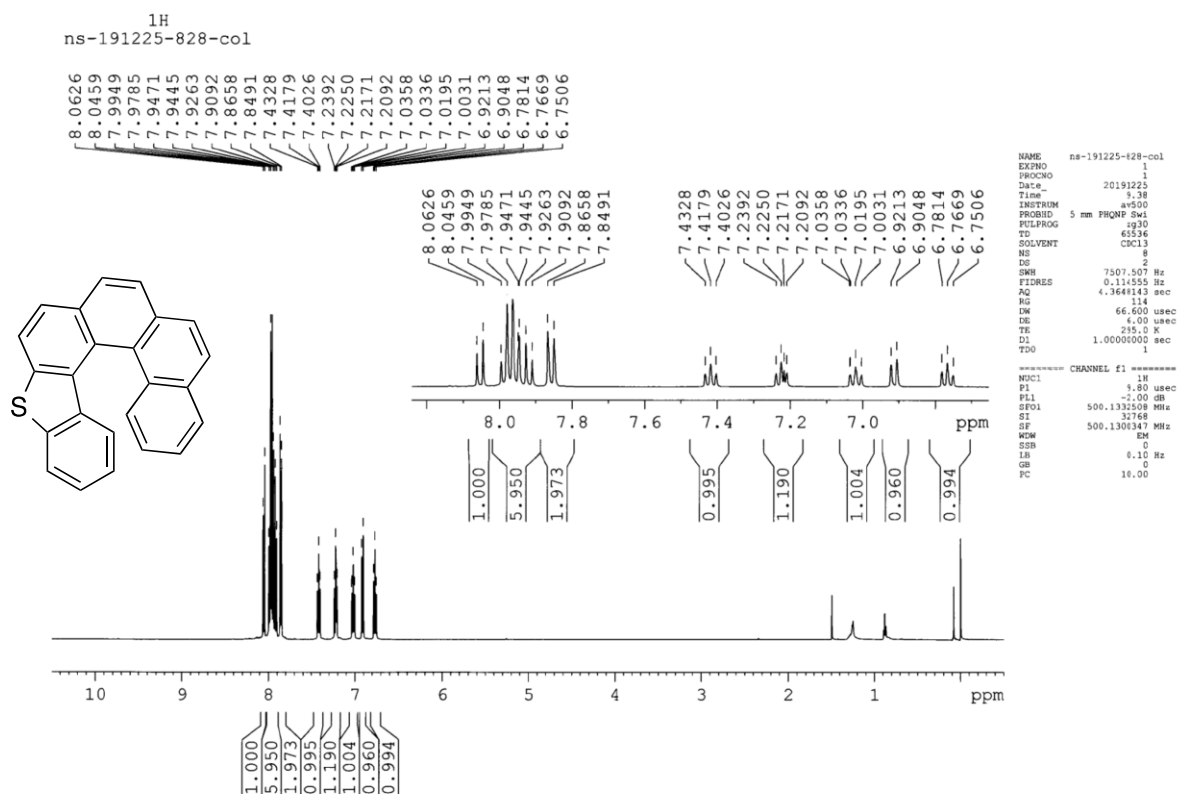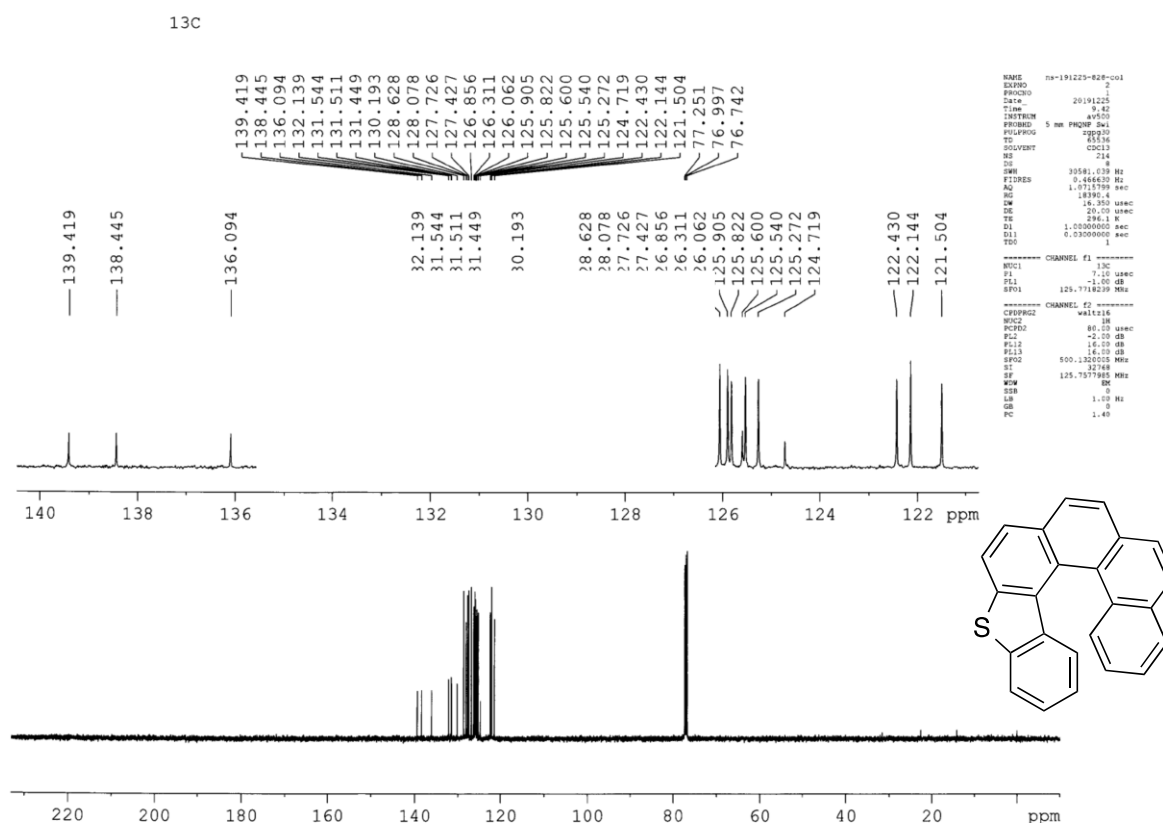

Supplement: Additional file 1 [file 1860-5397-17-35-S1.pdf]
